# Supplementary material for: A low-cost benthic incubation chamber for in-situ community metabolism measurements
Source: PeerJ. 2022 Apr 5;10:e13116. doi: 10.7717/peerj.13116 (PMC8992662; doi:10.7717/peerj.13116)
Supplement: Supplemental Information 2 [file peerj-10-13116-s002.xlsx]

## Sheet: Light.trans
wavelenght (n)m	transmission (%)
350	51.2861
351	51.5229
352	51.7607
353	51.9996
354	52.2396
355	52.4807
356	52.723
357	52.9663
358	53.2108
359	53.4564
360	53.7032
361	53.9511
362	54.2001
363	54.4503
364	54.7016
365	54.9541
366	55.2077
367	55.4626
368	55.7186
369	55.847
370	56.1048
371	56.3638
372	56.6239
373	56.8853
374	57.0164
375	57.2796
376	57.4116
377	57.6766
378	57.9429
379	58.0764
380	58.2103
381	58.479
382	58.6138
383	58.7489
384	59.0201
385	59.1562
386	59.2925
387	59.5662
388	59.7035
389	59.8412
390	59.9791
391	60.1174
392	60.256
393	60.3949
394	60.5341
395	60.6736
396	60.8135
397	60.8135
398	60.9537
399	60.9537
400	61.0942
401	61.0942
402	61.235
403	61.235
404	61.3762
405	61.3762
406	61.5177
407	61.6595
408	61.6595
409	61.8016
410	61.8016
411	61.9441
412	61.9441
413	61.9441
414	61.9441
415	61.9441
416	61.9441
417	61.8016
418	61.6595
419	61.5177
420	61.0942
421	60.6736
422	60.256
423	59.8412
424	59.4292
425	59.1562
426	59.0201
427	59.0201
428	59.1562
429	59.4292
430	59.7035
431	60.1174
432	60.5341
433	61.0942
434	61.5177
435	61.8016
436	62.23
437	62.5173
438	62.8058
439	62.9506
440	63.2412
441	63.387
442	63.5331
443	63.6796
444	63.8263
445	63.9735
446	64.121
447	64.121
448	64.2688
449	64.4169
450	64.4169
451	64.5654
452	64.5654
453	64.7143
454	64.8634
455	64.8634
456	64.8634
457	65.013
458	65.013
459	65.1628
460	65.1628
461	65.3131
462	65.3131
463	65.3131
464	65.4636
465	65.4636
466	65.6145
467	65.6145
468	65.6145
469	65.7658
470	65.7658
471	65.9174
472	65.9174
473	66.0693
474	66.0693
475	66.2217
476	66.2217
477	66.2217
478	66.2217
479	66.3743
480	66.3743
481	66.3743
482	66.3743
483	66.3743
484	66.3743
485	66.3743
486	66.3743
487	66.3743
488	66.3743
489	66.5273
490	66.5273
491	66.5273
492	66.5273
493	66.5273
494	66.5273
495	66.6807
496	66.6807
497	66.6807
498	66.6807
499	66.8344
500	66.8344
501	66.8344
502	66.9885
503	66.9885
504	66.9885
505	67.1429
506	67.1429
507	67.2977
508	67.2977
509	67.2977
510	67.2977
511	67.4528
512	67.4528
513	67.6083
514	67.6083
515	67.6083
516	67.6083
517	67.7642
518	67.7642
519	67.9204
520	67.9204
521	67.9204
522	68.0769
523	68.0769
524	68.0769
525	68.2339
526	68.2339
527	68.2339
528	68.2339
529	68.3912
530	68.3912
531	68.5488
532	68.5488
533	68.5488
534	68.5488
535	68.7068
536	68.7068
537	68.8652
538	68.8652
539	68.8652
540	68.8652
541	69.024
542	69.024
543	69.024
544	69.024
545	69.1831
546	69.1831
547	69.1831
548	69.1831
549	69.1831
550	69.3426
551	69.3426
552	69.3426
553	69.3426
554	69.3426
555	69.3426
556	69.5024
557	69.5024
558	69.5024
559	69.5024
560	69.5024
561	69.6627
562	69.6627
563	69.6627
564	69.6627
565	69.8232
566	69.8232
567	69.8232
568	69.8232
569	69.9842
570	69.9842
571	69.9842
572	70.1455
573	70.1455
574	70.1455
575	70.1455
576	70.3072
577	70.3072
578	70.3072
579	70.4693
580	70.4693
581	70.4693
582	70.4693
583	70.4693
584	70.6318
585	70.6318
586	70.6318
587	70.6318
588	70.7946
589	70.7946
590	70.7946
591	70.7946
592	70.7946
593	70.7946
594	70.9578
595	70.9578
596	70.9578
597	70.9578
598	70.9578
599	70.9578
600	70.9578
601	71.1214
602	71.1214
603	71.1214
604	71.1214
605	71.1214
606	71.2853
607	71.2853
608	71.2853
609	71.2853
610	71.2853
611	71.4496
612	71.4496
613	71.4496
614	71.4496
615	71.4496
616	71.4496
617	71.4496
618	71.6143
619	71.6143
620	71.6143
621	71.7794
622	71.7794
623	71.7794
624	71.7794
625	71.7794
626	71.7794
627	71.7794
628	71.7794
629	71.9449
630	71.9449
631	71.9449
632	71.9449
633	71.9449
634	71.9449
635	72.1107
636	72.1107
637	72.1107
638	72.1107
639	72.1107
640	72.1107
641	72.1107
642	72.1107
643	72.1107
644	72.1107
645	72.1107
646	72.1107
647	72.1107
648	72.277
649	72.277
650	72.277
651	72.277
652	72.277
653	72.277
654	72.277
655	72.277
656	72.4436
657	72.4436
658	72.4436
659	72.4436
660	72.6106
661	72.6106
662	72.6106
663	72.6106
664	72.6106
665	72.6106
666	72.6106
667	72.6106
668	72.778
669	72.778
670	72.778
671	72.9458
672	72.9458
673	72.9458
674	72.9458
675	72.9458
676	72.9458
677	72.9458
678	73.1139
679	73.1139
680	73.1139
681	73.1139
682	73.1139
683	73.2825
684	73.2825
685	73.2825
686	73.2825
687	73.2825
688	73.2825
689	73.2825
690	73.2825
691	73.4514
692	73.4514
693	73.4514
694	73.4514
695	73.4514
696	73.4514
697	73.4514
698	73.4514
699	73.4514
700	73.4514
701	73.6207
702	73.6207
703	73.6207
704	73.6207
705	73.6207
706	73.7904
707	73.7904
708	73.7904
709	73.6207
710	73.7904
711	73.7904
712	73.7904
713	73.7904
714	73.7904
715	73.9605
716	73.9605
717	73.9605
718	73.9605
719	73.9605
720	73.9605
721	73.9605
722	73.9605
723	73.9605
724	73.9605
725	73.9605
726	73.9605
727	74.131
728	74.131
729	74.131
730	74.131
731	74.131
732	74.131
733	74.131
734	74.131
735	74.131
736	74.131
737	74.131
738	74.3019
739	74.3019
740	74.3019
741	74.3019
742	74.3019
743	74.3019
744	74.4732
745	74.4732
746	74.4732
747	74.3019
748	74.3019
749	74.4732
750	74.4732
751	74.4732
752	74.4732
753	74.4732
754	74.4732
755	74.4732
756	74.6449
757	74.6449
758	74.6449
759	74.6449
760	74.6449
761	74.4732
762	74.6449
763	74.6449
764	74.6449
765	74.6449
766	74.6449
767	74.6449
768	74.6449
769	74.6449
770	74.817
771	74.817
772	74.817
773	74.817
774	74.817
775	74.817
776	74.817
777	74.817
778	74.817
779	74.817
780	74.817
781	74.817
782	74.817
783	74.9894
784	74.9894
785	74.9894
786	74.9894
787	74.9894
788	74.9894
789	74.9894
790	74.9894
791	74.9894
792	74.9894
793	74.9894
794	74.9894
795	74.9894
796	74.9894
797	75.1623
798	75.1623
799	75.1623
800	75.1623
