# Supplementary material for: A low-cost benthic incubation chamber for in-situ community metabolism measurements
Source: PeerJ. 2022 Apr 5;10:e13116. doi: 10.7717/peerj.13116 (PMC8992662; doi:10.7717/peerj.13116)
Supplement: Supplemental Information 3 [file peerj-10-13116-s003.xlsx]

## Sheet: Reef
Chamber	Type	Patch	Organism volume (cm3)	Organism volume (L)	Seawater volume (L)	Surface area (cm2)	3d model bottom surface area (cm2)	Sediment surrounding organisms (cm2)	sediments (%)	live coral (%)	dead coral (%)	turf algae (%)	macroalgae (%)	CCA (%)	cyanobacteria (%)	day	date	time	time.start	time.end	DO start (mg/l)	DO end (mg/l)	Salinity start (ppt)	Salinity end	Temperature start ©	Temperature end ©	pH start	pH end
1	sand	sand 1	0	0	30	1142.61	0	0	100	0	0	0	0	0	0	1	2019-08-01	day	13:20:00	16:56:00	6.37	5.09	36.27	36.26	30.9	30.1	7.8	7.91
1	sand	sand 1	0	0	30	1142.61	0	0	100	0	0	0	0	0	0	1	2019-08-01	night	17:48:00	21:32:00	6.3	4.4	35.96	36.42	31.1	29.5	7.8	7.76
2	coral	Coral 1	4586	4.586	25.414	1771.48	714.831	417.831	20	0	20	30	30	0	0	1	2019-08-01	night	18:01:00	21:36:00	6.26	1.2	35.96	36.43	30.8	29.7	8.1	7.54
2	coral	Coral 1	4586	4.586	25.414	1771.48	714.831	417.831	20	0	20	30	30	0	0	1	2019-08-01	day	13:04:00	16:51:00	6.21	10.26	36.39	36.2	30.9	29.9	7.84	7.9
3	coral	Coral 2	3798	3.798	26.202	2725.39	820.505	364.6	25	0	10	10	55	0	0	1	2019-08-01	day	12:52:00	16:36:00	6.22	9.23	36.11	36.2	30.8	29.6	7.82	7.9
3	coral	Coral 2	3798	3.798	26.202	2725.39	820.505	364.6	25	0	10	10	55	0	0	1	2019-08-01	night	18:13:00	21:43:00	6.29	4.75	35.89	36.47	30.6	29.6		7.78
4	algae	Algae 1	6738	6.738	23.262	2238.95	881.889	701.527	20	0	25	25	25	0	5	1	2019-08-01	night	18:23:00	21:53:00	6.22	2.22	36.4	36.43	30.8	29.7		7.65
4	algae	Algae 1	6738	6.738	23.262	2238.95	881.889	701.527	20	0	25	25	25	0	5	1	2019-08-01	day	12:46:00	16:30:00	6.23	9.35	36.08	36.29	30.9	29.8	7.86	7.9
5	algae	Algae 2	4450	4.45	25.55	2431.39	699.605	864.175	25	60	5	5	0	2.5	2.5	1	2019-08-01	day	12:36:00	16:26:00	7.21	9.04	36.25	36.25	30.9	30.1	7.82	7.84
5	algae	Algae 2	4450	4.45	25.55	2431.39	699.605	864.175	25	60	5	5	0	2.5	2.5	1	2019-08-01	night	18:31:00	21:58:00	6.22	2.5	35.86	36.38	30.9	29.8		7.59
6	algae	Algae 3	7183	7.183	22.817	3204.7	734.874	1119.54	25	60	0	2.5	5	5	2.5	1	2019-08-01	day	12:26:00	16:16:00	6.31	9.53	35.99	36.22	30.9	30.4	7.81	7.84
6	algae	Algae 3	7183	7.183	22.817	3204.7	734.874	1119.54	25	60	0	2.5	5	5	2.5	1	2019-08-01	night	18:40:00	22:08:00	6.22	1.42	35.99	36.49	30.8	29.7		7.59
0	sand	sand 2	0	0	30	1142.61	0	0	100	0	0	0	0	0	0	1	2019-08-01	day	12:14:00	16:10:00	6.33	6.34	36.33	36.16	30.8	30.4	7.77	7.89
0	sand	sand 2	0	0	30	1142.61	0	0	100	0	0	0	0	0	0	1	2019-08-01	night	18:50:00	22:01:00	6.15	4.33	36.01	36.49	30.8	29.8	8.04	7.47
7	coral	unhealthy coral	8231	8.231	21.769	4390.64	850.194	147.825	15	50	15	10	5	2.5	2.5	1	2019-08-01	night	18:58:00	22:13:00	6.21	2.14	36.2	36.51	30.9	29.9	8	7.6
7	coral	unhealthy coral	8231	8.231	21.769	4390.64	850.194	147.825	15	50	15	10	5	2.5	2.5	1	2019-08-01	day	12:00:00	15:55:00	6.88	8.67	36.32	36.3	31.5	30.5	7.8	7.88
9	sw	sw	1	0.001	29.999	1180	0	4000	0	0	0	0	0	0	0	1	2019-08-01	night	18:58:00	22:25:00	6.01	5.04	36	36.25	30.8	29.3	8	7.82
1	sand	sand 1	0	0	30	1142.61	0	0	100	0	0	0	0	0	0	2	2019-08-03	day	11:08:00	15:27:00	6.58	6.77	35.58	36.5	31.1	30.6	7.94	8.27
1	sand	sand 1	0	0	30	1142.61	0	0	100	0	0	0	0	0	0	2	2019-08-03	night	15:35:00	20:55:00	7.11	5.71	36.51	36.48	30.6	30.1	7.97	7.92
2	coral	Coral 1	4586	4.586	25.414	1771.48	714.831	417.831	20	0	20	30	30	0	0	2	2019-08-03	night	15:46:00	21:04:00	8.66	2.06	36.45	36.51	30.6	30.1	8.04	7.71
2	coral	Coral 1	4586	4.586	25.414	1771.48	714.831	417.831	20	0	20	30	30	0	0	2	2019-08-03	day	11:16:00	15:41:00	6.77	12.21	35.73	36.5	31	30.5	7.94	8.25
3	coral	Coral 2	3798	3.798	26.202	2725.39	820.505	364.6	25	0	10	10	55	0	0	2	2019-08-03	night	15:57:00	21:11:00	8.72	3.11	36.44	36.47	30.5	30	8.05	7.74
3	coral	Coral 2	3798	3.798	26.202	2725.39	820.505	364.6	25	0	10	10	55	0	0	2	2019-08-03	day	11:23:00	15:52:00	6.39	12.91	35.73	36.29	31.4	30.6	7.97	8.08
4	algae	Algae 1	6738	6.738	23.262	2238.95	881.889	701.527	20	0	25	25	25	0	5	0	2019-08-03	night	16:06:00	21:18:00	8.28	4.45	36.36	36.41	30.6	30	8.03	7.86
4	algae	Algae 1	6738	6.738	23.262	2238.95	881.889	701.527	20	0	25	25	25	0	5	2	2019-08-03	day	11:32:00	16:02:00	6.26	9.25	35.73	36.54	31.1	30.6	7.95	8.05
5	algae	Algae 2	4450	4.45	25.55	2431.39	699.605	864.175	25	60	5	5	0	2.5	2.5	2	2019-08-03	day	11:41:00	16:11:00	6.5	10.02	35.76	36.98	31	30.6	7.93	8.01
5	algae	Algae 2	4450	4.45	25.55	2431.39	699.605	864.175	25	60	5	5	0	2.5	2.5	2	2019-08-03	night	16:15:00	21:25:00	8.93	4.5	36.47	36.48	30.6	30	8.02	7.82
6	algae	Algae 3	7183	7.183	22.817	3204.7	734.874	1119.54	25	60	0	2.5	5	5	2.5	2	2019-08-03	day	11:49:00	16:21:00	6.33	10.96	35.69	36.47	31.1	30.6	7.95	7.97
6	algae	Algae 3	7183	7.183	22.817	3204.7	734.874	1119.54	25	60	0	2.5	5	5	2.5	2	2019-08-03	night	16:26:00	21:31:00	8.21	4.2	36.42	36.49	30.6	30	8	7.79
0	sand	sand 2	0	0	30	1142.61	0	0	100	0	0	0	0	0	0	0	2019-08-03	day	11:58:00	16:31:00	6.58	7.28	35.67	36.42	31.1	30.6	7.93	8.03
0	sand	sand 2	0	0	30	1142.61	0	0	100	0	0	0	0	0	0	0	2019-08-03	night	16:35:00	21:38:00	7.43	5.64	36.41	36.47	30.6	30	7.98	7.93
7	coral	unhealthy coral	8231	8.231	21.769	4390.64	850.194	147.825	15	50	15	10	5	2.5	2.5	2	2019-08-03	night	16:48:00	21:43:00	8.26	2.85	36.4	36.48	30.7	30	8	7.72
7	coral	unhealthy coral	8231	8.231	21.769	4390.64	850.194	147.825	15	50	15	10	5	2.5	2.5	2	2019-08-03	day	12:06:00	16:39:00	6.48	9.08	35.69	36.45	31.1	30.7	7.96	7.99
8	coral	Coral 3	2730	2.73	27.27	1032.43	528.224	853.053	50	35	2.5	10	0	0	2.5	2	2019-08-03	night	16:57:00	21:51:00	7.76	3.52	36.41	36.51	30.7	30	8	7.79
8	coral	Coral 3	2730	2.73	27.27	1032.43	528.224	853.053	50	35	2.5	10	0	0	2.5	2	2019-08-03	day	12:13:00	16:53:00	6.33	10.54	35.68	3.5	31.2	30.7	7.97	8.01
9	sw	sw	1	0.001	29.999	1180	0	4000	0	0	0	0	0	0	0	2	2019-08-03	night	17:01:00	21:56:00	7.77	4.87	36.34	36.11	30.7	29.9	7.99	7.85
9	sw	sw	1	0.001	29.999	1180	0	4000	0	0	0	0	0	0	0	2	2019-08-03	day	12:23:00	17:00:00	6.94	7.1	35.68	36.62	31	30.7	7.93	7.94
1	sand	sand 1	0	0	30	1142.61	0	0	100	0	0	0	0	0	0	3	2019-08-07	day	11:08:00	14:42:00	6.58	7.9	35.69	35.46	31.5	31.6	7.93	8.04
1	sand	sand 1	0	0	30	1142.61	0	0	100	0	0	0	0	0	0	3	2019-08-07	night	15:50:00	21:01:00	7.87	4.9	34.8	35.15	31.6	30.5	8.04	7.89
2	coral	Coral 1	4586	4.586	25.414	1771.48	714.831	417.831	20	0	20	30	30	0	0	3	2019-08-07	day	11:16:00	14:49:00	6.77	11.17	35.58	35.52	31.1	31.7	7.94	8.2
2	coral	Coral 1	4586	4.586	25.414	1771.48	714.831	417.831	20	0	20	30	30	0	0	3	2019-08-07	night	15:57:00	21:09:00	7.71	0.86	34.92	35.01	31.6	30.5	8.03	7.77
3	coral	Coral 2	3798	3.798	26.202	2725.39	820.505	364.6	25	0	10	10	55	0	0	3	2019-08-07	day	11:23:00	14:57:00	6.39	13.11	35.73	35.6	31	31.6	7.94	8.29
3	coral	Coral 2	3798	3.798	26.202	2725.39	820.505	364.6	25	0	10	10	55	0	0	3	2019-08-07	night	16:04:00	21:13:00	8.25	3.5	34.96	35.01	31.4	30.5	8.06	nd
4	algae	Algae 1	6738	6.738	23.262	2238.95	881.889	701.527	20	0	25	25	25	0	5	3	2019-08-07	day	11:32:00	15:04:00	6.26	9.01	35.73	35.23	31.4	31.5	7.97	8.08
4	algae	Algae 1	6738	6.738	23.262	2238.95	881.889	701.527	20	0	25	25	25	0	5	3	2019-08-07	night	16:09:00	21:17:00	7.51	3.34	35.09	35.01	31.5	30.5	8.04	nd
5	algae	Algae 2	4450	4.45	25.55	2431.39	699.605	864.175	25	60	5	5	0	2.5	2.5	3	2019-08-07	day	11:41:00	15:13:00	6.5	11.17	35.73	35.59	31.1	31.5	7.95	8.12
5	algae	Algae 2	4450	4.45	25.55	2431.39	699.605	864.175	25	60	5	5	0	2.5	2.5	3	2019-08-07	night	16:14:00	21:20:00	7.67	2.01	35.12	35	31.6	30.6	8.03	7.64
6	algae	Algae 3	7183	7.183	22.817	3204.7	734.874	1119.54	25	60	0	2.5	5	5	2.5	3	2019-08-07	day	11:49:00	15:22:00	6.33	11.65	35.76	35.5	31	31.5	7.93	8.12
6	algae	Algae 3	7183	7.183	22.817	3204.7	734.874	1119.54	25	60	0	2.5	5	5	2.5	3	2019-08-07	night	16:21:00	21:31:00	8.69	3.05	35.24	34.98	31.6	30.5	8.04	7.72
0	sand	sand 2	0	0	30	1142.61	0	0	100	0	0	0	0			3	2019-08-07	day	11:58:00	15:30:00	6.58	8.04	35.69	35.33	31.1	31.6	7.95	8.04
0	sand	sand 2	0	0	30	1142.61	0	0	100	0	0	0	0	0	0	3	2019-08-07	night	16:28:00	21:42:00	7.5	4.85	35.15	34.98	31.6	30.6	8.03	7.88
7	coral	unhealthy coral	8231	8.231	21.769	4390.64	850.194	147.825	15	50	15	10	5	2.5	2.5	3	2019-08-07	day	12:06:00	15:34:00	6.48	9.62	35.67	35.08	31.1	31.6	7.96	8.08
7	coral	unhealthy coral	8231	8.231	21.769	4390.64	850.194	147.825	15	50	15	10	5	2.5	2.5	3	2019-08-07	night	16:38:00	21:49:00	7.3	3.94	34.98	34.94	31.4	30.6	8.01	7.81
8	coral	Coral 3	2730	2.73	27.27	1032.43	528.224	853.053	50	35	2.5	10	0	0	2.5	3	2019-08-07	day	12:13:00	15:39:00	6.33	8.51	35.69	35.2	31.1	31.5	7.95	8.06
8	coral	Coral 3	2730	2.73	27.27	1032.43	528.224	853.053	50	35	2.5	10	0	0	2.5	3	2019-08-07	night	16:47:00	21:52:00	6.87	3.12	35.06	34.95	31.4	30.5	7.85	7.81
9	sw	sw	1	0.001	29.999	1180	0	4000	0	0	0	0	0	0	0	3	2019-08-07	day	12:17:00	15:43:00	6.64	7.85	35.68	34.66	31.2	31.5	7.97	8.03
9	sw	sw	1	0.001	29.999	1180	0	4000	0	0	0	0	0	0	0	3	2019-08-07	night	16:31:00	21:56:00	7.28	5.39	34.99	34.9	31.5	30.5	8.03	7.9
1	sand	sand 1	0	0	30	1142.61	0	0	100	0	0	0	0	0	0	4	2019-08-06	day	12:24:00	16:14:00	7.34	8.62	35.77	35.77	31.6	31.6	8.1	8.1
1	sand	sand 1	0	0	30	1142.61	0	0	100	0	0	0	0	0	0	4	2019-08-06	night	17:34:00	21:12:00	8.42	5.35	36.26	35.77	31.3	31.6	8.1	8
2	coral	Coral 1	4586	4.586	25.414	1771.48	714.831	417.831	20	0	20	30	30	0	0	4	2019-08-06	day	12:30:00	16:20:00	7.6	11.84	36.18	36.18	31.6	31.6	8.1	8.3
2	coral	Coral 1	4586	4.586	25.414	1771.48	714.831	417.831	20	0	20	30	30	0	0	4	2019-08-06	night	17:34:00	21:20:00	8.42	3.87	36.26	36.18	31.3	31.6	8.2	7.9
3	coral	Coral 2	3798	3.798	26.202	2725.39	820.505	364.6	25	0	10	10	55	0	0	4	2019-08-06	day	12:39:00	16:30:00	7.33	12.21	36.26	36.26	31.6	31.6	8.17	8.3
3	coral	Coral 2	3798	3.798	26.202	2725.39	820.505	364.6	25	0	10	10	55	0	0	4	2019-08-06	night	17:34:00	21:30:00	8.42	2.54	36.26	36.26	31.3	31.6	8.1	7.9
4	algae	Algae 1	6738	6.738	23.262	2238.95	881.889	701.527	20	0	25	25	25	0	5	4	2019-08-06	day	12:52:00	16:37:00	7.2	9.79	36.52	36.52	31.6	31.6	8.1	8.22
4	algae	Algae 1	6738	6.738	23.262	2238.95	881.889	701.527	20	0	25	25	25	0	5	4	2019-08-06	night	17:37:00	21:44:00	8.47	3.55	36.41	36.52	31.3	31.6	8.18	7.96
5	algae	Algae 2	4450	4.45	25.55	2431.39	699.605	864.175	25	60	5	5	0	2.5	2.5	4	2019-08-06	day	13:02:00	16:43:00	7.88	9.03	36.49	36.49	31.5	31.5	8.11	8.15
5	algae	Algae 2	4450	4.45	25.55	2431.39	699.605	864.175	25	60	5	5	0	2.5	2.5	4	2019-08-06	night	17:37:00	21:54:00	8.47	3.8	36.41	36.49	31.3	31.5	8.05	7.91
6	algae	Algae 3	7183	7.183	22.817	3204.7	734.874	1119.54	25	60	0	2.5	5	5	2.5	4	2019-08-06	day	13:17:00	16:50:00	7.78	11.75	36.31	36.31	31.5	31.5	8.2	8.1
6	algae	Algae 3	7183	7.183	22.817	3204.7	734.874	1119.54	25	60	0	2.5	5	5	2.5	4	2019-08-06	night	17:37:00	22:00:00	8.31	1.9	36.41	36.31	31.3	31.5	8.07	7.93
0	sand	sand 2	0	0	30	1142.61	0	0	100	0	0	0	0	0	0	4	2019-08-06	day	13:33:00	16:56:00	7.77	8.9	36.43	36.43	31.2	31.2	8.21	8.1
0	sand	sand 2	0	0	30	1142.61	0	0	100	0	0	0	0	0	0	4	2019-08-06	night	17:45:00	22:05:00	8.31	6.29	36.4	36.43	31.3	31.2	8.1	7.88
7	coral	unhealthy coral	8231	8.231	21.769	4390.64	850.194	147.825	15	50	15	10	5	2.5	2.5	4	2019-08-06	day	13:39:00	17:00:00	7.76	9.9	36.21	nd	31.2	31.2	8.18	nd
7	coral	unhealthy coral	8231	8.231	21.769	4390.64	850.194	147.825	15	50	15	10	5	2.5	2.5	4	2019-08-06	night	17:45:00	22:10:00	8.31	3.2	36.4	36.43	31.3	31.3	8.1	8
9	sw	sw	1	0.001	29.999	1180	0	4000	0	0	0	0	0	0	0	4	2019-08-06	day	13:24:00	17:13:00	7.91	8.8	36.43	36.43	31.4	31.4	8.2	8.2
9	sw	sw	1	0.001	29.999	1180	0	4000	0	0	0	0	0	0	0	4	2019-08-06	night	17:45:00	22:16:00	8.31	7.5	36.4	36.43	31.3	31.4	8.1	7.98
