# Supplementary material for: A low-cost benthic incubation chamber for in-situ community metabolism measurements
Source: PeerJ. 2022 Apr 5;10:e13116. doi: 10.7717/peerj.13116 (PMC8992662; doi:10.7717/peerj.13116)
Supplement: Supplemental Information 4 — PAR measured inside and outside of the chamber in the field [file peerj-10-13116-s004.xlsx]

## Sheet: PAR.field
Date	Time	Minutes	Inside (PAR umol m/s)	Outside (PAR umol m/s)
2019-07-30	08:20:32	0	0.1	0.23
2019-07-30	08:30:32	10	12.57	14.59
2019-07-30	08:40:32	20	52.81	59.22
2019-07-30	08:50:32	30	143.45	160.54
2019-07-30	09:00:32	40	91.97	103.06
2019-07-30	09:10:32	50	89.41	100.25
2019-07-30	09:20:32	60	21.29	24.12
2019-07-30	09:30:32	70	7.69	8.76
2019-07-30	09:40:32	80	169.07	189.19
2019-07-30	09:50:32	90	132.93	148.79
2019-07-30	10:00:32	100	47.17	53.31
2019-07-30	10:10:32	110	131.09	147.11
2019-07-30	10:20:32	120	408.5	457.39
2019-07-30	10:30:32	130	556.28	622.45
2019-07-30	10:40:32	140	587.27	657.07
2019-07-30	10:50:32	150	611.42	684.32
2019-07-30	11:00:32	160	633.51	708.61
2019-07-30	11:10:32	170	652.4	729.75
2019-07-30	11:20:32	180	664.84	743.64
2019-07-30	11:30:32	190	674.91	755.31
2019-07-30	11:40:32	200	685.59	767.15
2019-07-30	11:50:32	210	694.66	776.98
2019-07-30	12:00:32	220	701.97	785.57
2019-07-30	12:10:32	230	722.66	808.62
2019-07-30	12:20:32	240	727.69	814.26
2019-07-30	12:30:32	250	725.25	811.2
2019-07-30	12:40:32	260	749.33	838.51
2019-07-30	12:50:32	270	664.85	743.74
2019-07-30	13:00:32	280	746.37	834.82
2019-07-30	13:10:32	290	744.73	833.31
2019-07-30	13:20:32	300	588.99	658.92
2019-07-30	13:30:32	310	707.83	791.95
2019-07-30	13:40:32	320	691.87	773.9
2019-07-30	13:50:32	330	694.71	777.15
2019-07-30	14:00:32	340	707.23	791.27
2019-07-30	14:10:32	350	575.81	644.06
2019-07-30	14:20:32	360	537.65	601.58
2019-07-30	14:30:32	370	563.36	630.17
2019-07-30	14:40:32	380	457.69	512.31
2019-07-30	14:50:32	390	180.32	202.2
2019-07-30	15:00:32	400	128.84	144.63
2019-07-30	15:10:32	410	116.75	130.68
2019-07-30	15:20:32	420	104.8	117.42
2019-07-30	15:30:32	430	106.3	119.2
2019-07-30	15:40:32	440	116.19	130.37
2019-07-30	15:50:32	450	39.91	45.19
2019-07-30	16:00:32	460	39.05	43.78
2019-07-30	16:10:32	470	25.88	29.19
2019-07-30	16:20:32	480	11.01	12.65
2019-07-30	16:30:32	490	20.87	23.65
2019-07-30	16:40:32	500	29.33	33.21
2019-07-30	16:50:32	510	46.01	51.77
2019-07-30	17:00:32	520	15.31	17.28
2019-07-30	17:10:32	530	0.58	1.07
2019-07-30	17:20:32	540	0.55	1.07
2019-07-30	17:30:32	550	0.5	1
2019-07-30	17:40:32	560	0.43	0.84
2019-07-30	17:50:32	570	0.34	0.6
2019-07-30	18:00:32	580	0.28	0.44
2019-07-30	18:10:32	590	0.16	0.7
2019-07-30	18:20:32	600	0.17	0.4
2019-07-30	18:30:32	610	0.02	0.27
2019-08-01	08:10:32	2870	1.51	2.04
2019-08-01	08:20:32	2880	53.84	60.46
2019-08-01	08:30:32	2890	294.08	329.32
2019-08-01	08:40:32	2900	235.9	264.34
2019-08-01	08:50:32	2910	142.49	159.76
2019-08-01	09:00:32	2920	206.99	231.9
2019-08-01	09:10:32	2930	330.5	369.75
2019-08-01	09:20:32	2940	449.42	502.75
2019-08-01	09:30:32	2950	266.63	298.29
2019-08-01	09:40:32	2960	408.5	456.98
2019-08-01	09:50:32	2970	437.87	490.1
2019-08-01	10:00:32	2980	478.07	535.15
2019-08-01	10:10:32	2990	520.58	582.33
2019-08-01	10:20:32	3000	542.79	607.15
2019-08-01	10:30:32	3010	583.36	652.91
2019-08-01	10:40:32	3020	600.85	672.31
2019-08-01	10:50:32	3030	597.5	668.35
2019-08-01	11:00:32	3040	582.86	652.28
2019-08-01	11:10:32	3050	717.52	802.85
2019-08-01	11:20:32	3060	621.07	695.12
2019-08-01	11:30:32	3070	627.68	702.4
2019-08-01	11:40:32	3080	583.35	652.91
2019-08-01	11:50:32	3090	327.63	366.83
2019-08-01	12:00:32	3100	580.46	649.39
2019-08-01	12:10:32	3110	779.21	871.63
2019-08-01	12:20:32	3120	649.67	727.06
2019-08-01	12:30:32	3130	192.74	215.99
2019-08-01	12:40:32	3140	153.55	171.88
2019-08-01	12:50:32	3150	614.01	687.2
2019-08-01	13:00:32	3160	399.1	446.85
2019-08-01	13:10:32	3170	528.62	591.72
2019-08-01	13:20:32	3180	295.43	330.8
2019-08-01	13:30:32	3190	346.79	388.34
2019-08-01	13:40:32	3200	604.81	676.84
2019-08-01	13:50:32	3210	382.03	427.69
2019-08-01	14:00:32	3220	114.07	127.92
2019-08-01	14:10:32	3230	95.2	106.79
2019-08-01	14:20:32	3240	100.19	112.26
2019-08-01	14:30:32	3250	92.57	103.94
2019-08-01	14:40:32	3260	85	95.38
2019-08-01	14:50:32	3270	77.99	87.63
2019-08-01	15:00:32	3280	70.88	79.71
2019-08-01	15:10:32	3290	65.11	72.97
2019-08-01	15:20:32	3300	55.97	62.8
2019-08-01	15:30:32	3310	46.64	52.4
2019-08-01	15:40:32	3320	50.53	56.97
2019-08-01	15:50:32	3330	55.99	62.97
2019-08-01	16:00:32	3340	56.61	63.44
2019-08-01	16:10:32	3350	50.98	57.14
2019-08-01	16:20:32	3360	44.41	49.82
2019-08-01	16:30:32	3370	42.77	48.34
2019-08-01	16:40:32	3380	43.12	48.54
2019-08-01	16:50:32	3390	41.73	46.9
2019-08-01	17:00:32	3400	39.14	44.22
2019-08-01	17:10:32	3410	41.73	47.1
2019-08-01	17:20:32	3420	43.59	49.28
2019-08-01	17:30:32	3430	46.07	52.03
2019-08-01	17:40:32	3440	44.87	50.59
2019-08-01	17:50:32	3450	34.75	39.02
2019-08-01	18:00:32	3460	41.41	46.87
2019-08-01	18:10:32	3470	36.43	41.3
2019-08-01	18:20:32	3480	33.19	37.37
2019-08-01	18:30:32	3490	25.75	29.15
2019-08-01	18:40:32	3500	18.94	21.7
2019-08-01	18:50:32	3510	12.93	14.59
2019-08-01	19:00:32	3520	7.53	8.75
2019-08-01	19:10:32	3530	4.04	4.76
2019-08-01	19:20:32	3540	1.63	2.18
2019-08-01	19:30:32	3550	0.44	0.64
2019-08-03	08:30:32	5770	0.09	0.23
2019-08-03	08:40:32	5780	0.02	0.37
2019-08-03	08:50:32	5790	11.47	13.28
2019-08-03	09:00:32	5800	27.34	30.9
2019-08-03	09:10:32	5810	29.39	33.28
2019-08-03	09:20:32	5820	570.52	638.25
2019-08-03	09:30:32	5830	91.19	102.09
2019-08-03	09:40:32	5840	46.47	52.1
2019-08-03	09:50:32	5850	43.07	48.58
2019-08-03	10:00:32	5860	43.43	48.88
2019-08-03	10:10:32	5870	59.66	66.96
2019-08-03	10:20:32	5880	44.73	50.56
2019-08-03	10:30:32	5890	67.27	75.79
2019-08-03	10:40:32	5900	81.27	91.22
2019-08-03	10:50:32	5910	80.18	90.11
2019-08-03	11:00:32	5920	93.35	104.81
2019-08-03	11:10:32	5930	83.2	93.47
2019-08-03	11:20:32	5940	370.61	414.98
2019-08-03	11:30:32	5950	599.96	671.4
2019-08-03	11:40:32	5960	503.2	562.97
2019-08-03	11:50:32	5970	663.45	742.39
2019-08-03	12:00:32	5980	532.71	596.28
2019-08-03	12:10:32	5990	657.16	735.35
2019-08-03	12:20:32	6000	674.62	754.97
2019-08-03	12:30:32	6010	704.47	788.09
2019-08-03	12:40:32	6020	728.99	815.37
2019-08-03	12:50:32	6030	648.77	725.95
2019-08-03	13:00:32	6040	492.39	551.09
2019-08-03	13:10:32	6050	608.77	680.96
2019-08-03	13:20:32	6060	738.69	826.24
2019-08-03	13:30:32	6070	672.49	752.42
2019-08-03	13:40:32	6080	674.8	754.97
2019-08-03	13:50:32	6090	335.21	375.29
2019-08-03	14:00:32	6100	283.05	317.08
2019-08-03	14:10:32	6110	277.88	311.01
2019-08-03	14:20:32	6120	295.59	331.1
2019-08-03	14:30:32	6130	406.37	454.97
2019-08-03	14:40:32	6140	510.83	571.79
2019-08-03	14:50:32	6150	445.05	497.85
2019-08-03	15:00:32	6160	539	603.03
2019-08-03	15:10:32	6170	306.55	343.18
2019-08-03	15:20:32	6180	183.71	205.56
2019-08-03	15:30:32	6190	148.09	165.87
2019-08-03	15:40:32	6200	139.01	155.57
2019-08-03	15:50:32	6210	149.9	167.78
2019-08-03	16:00:32	6220	148.39	166.11
2019-08-03	16:10:32	6230	153.35	172.01
2019-08-03	16:20:32	6240	132.58	148.79
2019-08-03	16:30:32	6250	162.97	182.41
2019-08-03	16:40:32	6260	159.52	178.62
2019-08-03	16:50:32	6270	181.96	203.91
2019-08-03	17:00:32	6280	208.54	233.34
2019-08-03	17:10:32	6290	276.03	309.13
2019-08-03	17:20:32	6300	244.11	273.53
2019-08-03	17:30:32	6310	130.06	145.67
2019-08-03	17:40:32	6320	85.25	95.85
2019-08-03	17:50:32	6330	70.64	79.14
2019-08-03	18:00:32	6340	65.14	72.97
2019-08-03	18:10:32	6350	61.45	69.08
2019-08-03	18:20:32	6360	56.91	63.88
2019-08-03	18:30:32	6370	47.78	53.98
2019-08-03	18:40:32	6380	38.24	43.01
2019-08-03	18:50:32	6390	26.42	30.09
2019-08-03	19:00:32	6400	14.54	16.61
2019-08-03	19:10:32	6410	7.54	8.95
2019-08-03	19:20:32	6420	3.38	4.12
2019-08-03	19:30:32	6430	0.87	1.11
2019-08-07	06:30:32	11410	0.53	1.1
2019-08-07	06:40:32	11420	2.15	2.72
2019-08-07	06:50:32	11430	4.61	5.57
2019-08-07	07:00:32	11440	7.35	8.75
2019-08-07	07:10:32	11450	9.99	11.71
2019-08-07	07:20:32	11460	12.26	14.16
2019-08-07	07:30:32	11470	14.67	16.64
2019-08-07	07:40:32	11480	17.3	19.89
2019-08-07	07:50:32	11490	19.65	22.41
2019-08-07	08:00:32	11500	21.13	24.19
2019-08-07	08:10:32	11510	23.59	26.94
2019-08-07	08:20:32	11520	24.99	28.08
2019-08-07	08:30:32	11530	26.63	30.29
2019-08-07	08:40:32	11540	28.24	31.7
2019-08-07	08:50:32	11550	29.55	33.48
2019-08-07	09:00:32	11560	31.21	35.06
2019-08-07	09:10:32	11570	36.85	41.37
2019-08-07	09:20:32	11580	34.46	38.68
2019-08-07	09:30:32	11590	34	38.45
2019-08-07	09:40:32	11600	33.81	38.14
2019-08-07	09:50:32	11610	34.31	38.78
2019-08-07	10:00:32	11620	34.77	39.32
2019-08-07	10:10:32	11630	34.97	39.42
2019-08-07	10:20:32	11640	16.58	18.79
2019-08-07	10:30:32	11650	13.36	15.46
2019-08-07	10:40:32	11660	33.5	37.71
2019-08-07	10:50:32	11670	33.01	37.37
2019-08-07	11:00:32	11680	200.05	223.98
2019-08-07	11:10:32	11690	390.28	436.69
2019-08-07	11:20:32	11700	489.37	547.53
2019-08-07	11:30:32	11710	512.27	573.3
2019-08-07	11:40:32	11720	494.36	553.1
2019-08-07	11:50:32	11730	580.25	649.02
2019-08-07	12:00:32	11740	581.91	651.3
2019-08-07	12:10:32	11750	603.61	675.19
2019-08-07	12:20:32	11760	588.97	659.22
2019-08-07	12:30:32	11770	590.83	661.2
2019-08-07	12:40:32	11780	611.42	684.12
2019-08-07	12:50:32	11790	629.67	704.31
2019-08-07	13:00:32	11800	581.08	650.06
2019-08-07	13:10:32	11810	649.84	727.26
2019-08-07	13:20:32	11820	632.5	707.57
2019-08-07	13:30:32	11830	629.24	704.14
2019-08-07	13:40:32	11840	619.29	692.91
2019-08-07	13:50:32	11850	618.75	692.5
2019-08-07	14:00:32	11860	624.7	698.75
2019-08-07	14:10:32	11870	541.78	606.41
2019-08-07	14:20:32	11880	560.78	627.68
2019-08-07	14:30:32	11890	577.46	646.04
2019-08-07	14:40:32	11900	518.65	580.48
2019-08-07	14:50:32	11910	355.84	398.37
2019-08-07	15:00:32	11920	475.29	531.77
2019-08-07	15:10:32	11930	289	323.32
2019-08-07	15:20:32	11940	194.31	217.64
2019-08-07	15:30:32	11950	260.57	291.72
2019-08-07	15:40:32	11960	151.7	170
2019-08-07	15:50:32	11970	95.57	107.39
2019-08-07	16:00:32	11980	79.64	89.41
2019-08-07	16:10:32	11990	69.65	78.4
2019-08-07	16:20:32	12000	52.82	59.42
2019-08-07	16:30:32	12010	42.73	48.04
2019-08-07	16:40:32	12020	14.18	16.2
2019-08-07	16:50:32	12030	24.92	28.21
2019-08-07	17:00:32	12040	32.32	36.67
2019-08-07	17:10:32	12050	1	1.54
2019-08-07	17:20:32	12060	1.01	1.54
2019-08-07	17:30:32	12070	1.05	1.71
2019-08-07	17:40:32	12080	4.04	4.86
2019-08-07	17:50:32	12090	0.65	1.24
2019-08-07	18:00:32	12100	0.69	1.31
2019-08-07	18:10:32	12110	0.64	1.04
2019-08-07	18:20:32	12120	0.58	0.77
2019-08-07	18:30:32	12130	0.59	1.07
2019-08-07	18:40:32	12140	0.95	1.37
2019-08-07	18:50:32	12150	0.58	0.77
2019-08-07	19:00:32	12160	0.35	0.5
2019-08-07	19:10:32	12170	0.03	0.27
