# Supplementary material for: A low-cost benthic incubation chamber for in-situ community metabolism measurements
Source: PeerJ. 2022 Apr 5;10:e13116. doi: 10.7717/peerj.13116 (PMC8992662; doi:10.7717/peerj.13116)
Supplement: Supplemental Information 5 [file peerj-10-13116-s005.xlsx]

## Sheet: Reef_PAR
Date	Time	Minutes	PAR
2019-07-30	08:20:32	0	0.12
2019-07-30	08:30:32	10	12.6
2019-07-30	08:40:32	20	52.86
2019-07-30	08:50:32	30	143.46
2019-07-30	09:00:32	40	91.98
2019-07-30	09:10:32	50	89.46
2019-07-30	09:20:32	60	21.3
2019-07-30	09:30:32	70	7.74
2019-07-30	09:40:32	80	169.08
2019-07-30	09:50:32	90	132.96
2019-07-30	10:00:32	100	47.22
2019-07-30	10:10:32	110	131.1
2019-07-30	10:20:32	120	408.54
2019-07-30	10:30:32	130	556.32
2019-07-30	10:40:32	140	587.28
2019-07-30	10:50:32	150	611.46
2019-07-30	11:00:32	160	633.54
2019-07-30	11:10:32	170	652.44
2019-07-30	11:20:32	180	664.86
2019-07-30	11:30:32	190	674.94
2019-07-30	11:40:32	200	685.62
2019-07-30	11:50:32	210	694.68
2019-07-30	12:00:32	220	702
2019-07-30	12:10:32	230	722.7
2019-07-30	12:20:32	240	727.74
2019-07-30	12:30:32	250	725.28
2019-07-30	12:40:32	260	749.34
2019-07-30	12:50:32	270	664.86
2019-07-30	13:00:32	280	746.4
2019-07-30	13:10:32	290	744.78
2019-07-30	13:20:32	300	589.02
2019-07-30	13:30:32	310	707.88
2019-07-30	13:40:32	320	691.92
2019-07-30	13:50:32	330	694.74
2019-07-30	14:00:32	340	707.28
2019-07-30	14:10:32	350	575.82
2019-07-30	14:20:32	360	537.66
2019-07-30	14:30:32	370	563.4
2019-07-30	14:40:32	380	457.74
2019-07-30	14:50:32	390	180.36
2019-07-30	15:00:32	400	128.88
2019-07-30	15:10:32	410	116.76
2019-07-30	15:20:32	420	104.82
2019-07-30	15:30:32	430	106.32
2019-07-30	15:40:32	440	116.22
2019-07-30	15:50:32	450	39.96
2019-07-30	16:00:32	460	39.06
2019-07-30	16:10:32	470	25.92
2019-07-30	16:20:32	480	11.04
2019-07-30	16:30:32	490	20.88
2019-07-30	16:40:32	500	29.34
2019-07-30	16:50:32	510	46.02
2019-07-30	17:00:32	520	15.36
2019-07-30	17:10:32	530	0.6
2019-07-30	17:20:32	540	0.6
2019-07-30	17:30:32	550	0.54
2019-07-30	17:40:32	560	0.48
2019-07-30	17:50:32	570	0.36
2019-07-30	18:00:32	580	0.3
2019-07-30	18:10:32	590	0.18
2019-07-30	18:20:32	600	0.18
2019-07-30	18:30:32	610	0.06
2019-07-30	18:40:32	620	0
2019-07-30	18:50:32	630	0
2019-07-30	19:00:32	640	0
2019-07-30	19:10:32	650	0
2019-07-30	19:20:32	660	0
2019-07-30	19:30:32	670	0
2019-07-30	19:40:32	680	0
2019-07-30	19:50:32	690	0
2019-07-30	20:00:32	700	0
2019-07-30	20:10:32	710	0
2019-07-30	20:20:32	720	0
2019-07-30	20:30:32	730	0
2019-07-30	20:40:32	740	0
2019-07-30	20:50:32	750	0
2019-07-30	21:00:32	760	0
2019-07-30	21:10:32	770	0
2019-07-30	21:20:32	780	0
2019-07-30	21:30:32	790	0
2019-07-30	21:40:32	800	0
2019-07-30	21:50:32	810	0
2019-07-30	22:00:32	820	0
2019-07-30	22:10:32	830	0
2019-07-30	22:20:32	840	0
2019-07-30	22:30:32	850	0
2019-07-30	22:40:32	860	0
2019-07-30	22:50:32	870	0
2019-07-30	23:00:32	880	0
2019-07-30	23:10:32	890	0
2019-07-30	23:20:32	900	0
2019-07-30	23:30:32	910	0
2019-07-30	23:40:32	920	0
2019-07-30	23:50:32	930	0
2019-07-31	00:00:32	940	0
2019-07-31	00:10:32	950	0
2019-07-31	00:20:32	960	0
2019-07-31	00:30:32	970	0
2019-07-31	00:40:32	980	0
2019-07-31	00:50:32	990	0
2019-07-31	01:00:32	1000	0
2019-07-31	01:10:32	1010	0
2019-07-31	01:20:32	1020	0
2019-07-31	01:30:32	1030	0
2019-07-31	01:40:32	1040	0
2019-07-31	01:50:32	1050	0
2019-07-31	02:00:32	1060	0
2019-07-31	02:10:32	1070	0
2019-07-31	02:20:32	1080	0
2019-07-31	02:30:32	1090	0
2019-07-31	02:40:32	1100	0
2019-07-31	02:50:32	1110	0
2019-07-31	03:00:32	1120	0
2019-07-31	03:10:32	1130	0
2019-07-31	03:20:32	1140	0
2019-07-31	03:30:32	1150	0
2019-07-31	03:40:32	1160	0
2019-07-31	03:50:32	1170	0
2019-07-31	04:00:32	1180	0
2019-07-31	04:10:32	1190	0
2019-07-31	04:20:32	1200	0
2019-07-31	04:30:32	1210	0
2019-07-31	04:40:32	1220	0
2019-07-31	04:50:32	1230	0
2019-07-31	05:00:32	1240	0
2019-07-31	05:10:32	1250	0
2019-07-31	05:20:32	1260	0
2019-07-31	05:30:32	1270	0
2019-07-31	05:40:32	1280	0
2019-07-31	05:50:32	1290	0
2019-07-31	06:00:32	1300	0
2019-07-31	06:10:32	1310	0
2019-07-31	06:20:32	1320	0
2019-07-31	06:30:32	1330	0
2019-07-31	06:40:32	1340	0
2019-07-31	06:50:32	1350	0
2019-07-31	07:00:32	1360	0
2019-07-31	07:10:32	1370	0
2019-07-31	07:20:32	1380	0
2019-07-31	07:30:32	1390	0
2019-07-31	07:40:32	1400	0
2019-07-31	07:50:32	1410	0.12
2019-07-31	08:00:32	1420	0.24
2019-07-31	08:10:32	1430	0.24
2019-07-31	08:20:32	1440	0.42
2019-07-31	08:30:32	1450	0.36
2019-07-31	08:40:32	1460	0.3
2019-07-31	08:50:32	1470	0.36
2019-07-31	09:00:32	1480	0.3
2019-07-31	09:10:32	1490	0.48
2019-07-31	09:20:32	1500	0.48
2019-07-31	09:30:32	1510	0.48
2019-07-31	09:40:32	1520	0.42
2019-07-31	09:50:32	1530	0.42
2019-07-31	10:00:32	1540	0.48
2019-07-31	10:10:32	1550	0.48
2019-07-31	10:20:32	1560	0.48
2019-07-31	10:30:32	1570	0.48
2019-07-31	10:40:32	1580	0.54
2019-07-31	10:50:32	1590	0.48
2019-07-31	11:00:32	1600	0.48
2019-07-31	11:10:32	1610	0.54
2019-07-31	11:20:32	1620	0.54
2019-07-31	11:30:32	1630	0.54
2019-07-31	11:40:32	1640	0.6
2019-07-31	11:50:32	1650	0.54
2019-07-31	12:00:32	1660	0.54
2019-07-31	12:10:32	1670	0.48
2019-07-31	12:20:32	1680	0.6
2019-07-31	12:30:32	1690	0.6
2019-07-31	12:40:32	1700	0.54
2019-07-31	12:50:32	1710	0.6
2019-07-31	13:00:32	1720	0.54
2019-07-31	13:10:32	1730	0.6
2019-07-31	13:20:32	1740	0.6
2019-07-31	13:30:32	1750	0.6
2019-07-31	13:40:32	1760	0.48
2019-07-31	13:50:32	1770	0.54
2019-07-31	14:00:32	1780	0.48
2019-07-31	14:10:32	1790	0.48
2019-07-31	14:20:32	1800	0.48
2019-07-31	14:30:32	1810	0.54
2019-07-31	14:40:32	1820	0.66
2019-07-31	14:50:32	1830	0.54
2019-07-31	15:00:32	1840	0.6
2019-07-31	15:10:32	1850	0.6
2019-07-31	15:20:32	1860	0.72
2019-07-31	15:30:32	1870	0.72
2019-07-31	15:40:32	1880	0.72
2019-07-31	15:50:32	1890	0.66
2019-07-31	16:00:32	1900	0.72
2019-07-31	16:10:32	1910	0.72
2019-07-31	16:20:32	1920	0.78
2019-07-31	16:30:32	1930	0.72
2019-07-31	16:40:32	1940	0.6
2019-07-31	16:50:32	1950	0.6
2019-07-31	17:00:32	1960	0.3
2019-07-31	17:10:32	1970	0.12
2019-07-31	17:20:32	1980	0.06
2019-07-31	17:30:32	1990	0
2019-07-31	17:40:32	2000	0
2019-07-31	17:50:32	2010	0
2019-07-31	18:00:32	2020	0
2019-07-31	18:10:32	2030	0
2019-07-31	18:20:32	2040	0
2019-07-31	18:30:32	2050	0
2019-07-31	18:40:32	2060	0
2019-07-31	18:50:32	2070	0
2019-07-31	19:00:32	2080	0
2019-07-31	19:10:32	2090	0
2019-07-31	19:20:32	2100	0
2019-07-31	19:30:32	2110	0
2019-07-31	19:40:32	2120	0
2019-07-31	19:50:32	2130	0
2019-07-31	20:00:32	2140	0
2019-07-31	20:10:32	2150	0
2019-07-31	20:20:32	2160	0
2019-07-31	20:30:32	2170	0
2019-07-31	20:40:32	2180	0
2019-07-31	20:50:32	2190	0
2019-07-31	21:00:32	2200	0
2019-07-31	21:10:32	2210	0
2019-07-31	21:20:32	2220	0
2019-07-31	21:30:32	2230	0
2019-07-31	21:40:32	2240	0
2019-07-31	21:50:32	2250	0
2019-07-31	22:00:32	2260	0
2019-07-31	22:10:32	2270	0
2019-07-31	22:20:32	2280	0
2019-07-31	22:30:32	2290	0
2019-07-31	22:40:32	2300	0
2019-07-31	22:50:32	2310	0
2019-07-31	23:00:32	2320	0
2019-07-31	23:10:32	2330	0
2019-07-31	23:20:32	2340	0
2019-07-31	23:30:32	2350	0
2019-07-31	23:40:32	2360	0
2019-07-31	23:50:32	2370	0
2019-08-01	00:00:32	2380	0
2019-08-01	00:10:32	2390	0
2019-08-01	00:20:32	2400	0
2019-08-01	00:30:32	2410	0
2019-08-01	00:40:32	2420	0
2019-08-01	00:50:32	2430	0
2019-08-01	01:00:32	2440	0
2019-08-01	01:10:32	2450	0
2019-08-01	01:20:32	2460	0
2019-08-01	01:30:32	2470	0
2019-08-01	01:40:32	2480	0
2019-08-01	01:50:32	2490	0
2019-08-01	02:00:32	2500	0
2019-08-01	02:10:32	2510	0
2019-08-01	02:20:32	2520	0
2019-08-01	02:30:32	2530	0
2019-08-01	02:40:32	2540	0
2019-08-01	02:50:32	2550	0
2019-08-01	03:00:32	2560	0
2019-08-01	03:10:32	2570	0
2019-08-01	03:20:32	2580	0
2019-08-01	03:30:32	2590	0
2019-08-01	03:40:32	2600	0
2019-08-01	03:50:32	2610	0
2019-08-01	04:00:32	2620	0
2019-08-01	04:10:32	2630	0
2019-08-01	04:20:32	2640	0
2019-08-01	04:30:32	2650	0
2019-08-01	04:40:32	2660	0
2019-08-01	04:50:32	2670	0
2019-08-01	05:00:32	2680	0
2019-08-01	05:10:32	2690	0
2019-08-01	05:20:32	2700	0
2019-08-01	05:30:32	2710	0
2019-08-01	05:40:32	2720	0
2019-08-01	05:50:32	2730	0
2019-08-01	06:00:32	2740	0
2019-08-01	06:10:32	2750	0
2019-08-01	06:20:32	2760	0
2019-08-01	06:30:32	2770	0
2019-08-01	06:40:32	2780	0
2019-08-01	06:50:32	2790	0
2019-08-01	07:00:32	2800	0
2019-08-01	07:10:32	2810	0
2019-08-01	07:20:32	2820	0
2019-08-01	07:30:32	2830	0
2019-08-01	07:40:32	2840	0
2019-08-01	07:50:32	2850	0
2019-08-01	08:00:32	2860	0
2019-08-01	08:10:32	2870	1.56
2019-08-01	08:20:32	2880	53.88
2019-08-01	08:30:32	2890	294.12
2019-08-01	08:40:32	2900	235.92
2019-08-01	08:50:32	2910	142.5
2019-08-01	09:00:32	2920	207
2019-08-01	09:10:32	2930	330.54
2019-08-01	09:20:32	2940	449.46
2019-08-01	09:30:32	2950	266.64
2019-08-01	09:40:32	2960	408.54
2019-08-01	09:50:32	2970	437.88
2019-08-01	10:00:32	2980	478.08
2019-08-01	10:10:32	2990	520.62
2019-08-01	10:20:32	3000	542.82
2019-08-01	10:30:32	3010	583.38
2019-08-01	10:40:32	3020	600.9
2019-08-01	10:50:32	3030	597.54
2019-08-01	11:00:32	3040	582.9
2019-08-01	11:10:32	3050	717.54
2019-08-01	11:20:32	3060	621.12
2019-08-01	11:30:32	3070	627.72
2019-08-01	11:40:32	3080	583.38
2019-08-01	11:50:32	3090	327.66
2019-08-01	12:00:32	3100	580.5
2019-08-01	12:10:32	3110	779.22
2019-08-01	12:20:32	3120	649.68
2019-08-01	12:30:32	3130	192.78
2019-08-01	12:40:32	3140	153.6
2019-08-01	12:50:32	3150	614.04
2019-08-01	13:00:32	3160	399.12
2019-08-01	13:10:32	3170	528.66
2019-08-01	13:20:32	3180	295.44
2019-08-01	13:30:32	3190	346.8
2019-08-01	13:40:32	3200	604.86
2019-08-01	13:50:32	3210	382.08
2019-08-01	14:00:32	3220	114.12
2019-08-01	14:10:32	3230	95.22
2019-08-01	14:20:32	3240	100.2
2019-08-01	14:30:32	3250	92.58
2019-08-01	14:40:32	3260	85.02
2019-08-01	14:50:32	3270	78
2019-08-01	15:00:32	3280	70.92
2019-08-01	15:10:32	3290	65.16
2019-08-01	15:20:32	3300	55.98
2019-08-01	15:30:32	3310	46.68
2019-08-01	15:40:32	3320	50.58
2019-08-01	15:50:32	3330	56.04
2019-08-01	16:00:32	3340	56.64
2019-08-01	16:10:32	3350	51
2019-08-01	16:20:32	3360	44.46
2019-08-01	16:30:32	3370	42.78
2019-08-01	16:40:32	3380	43.14
2019-08-01	16:50:32	3390	41.76
2019-08-01	17:00:32	3400	39.18
2019-08-01	17:10:32	3410	41.76
2019-08-01	17:20:32	3420	43.62
2019-08-01	17:30:32	3430	46.08
2019-08-01	17:40:32	3440	44.88
2019-08-01	17:50:32	3450	34.8
2019-08-01	18:00:32	3460	41.46
2019-08-01	18:10:32	3470	36.48
2019-08-01	18:20:32	3480	33.24
2019-08-01	18:30:32	3490	25.8
2019-08-01	18:40:32	3500	18.96
2019-08-01	18:50:32	3510	12.96
2019-08-01	19:00:32	3520	7.56
2019-08-01	19:10:32	3530	4.08
2019-08-01	19:20:32	3540	1.68
2019-08-01	19:30:32	3550	0.48
2019-08-01	19:40:32	3560	0
2019-08-01	19:50:32	3570	0
2019-08-01	20:00:32	3580	0
2019-08-01	20:10:32	3590	0
2019-08-01	20:20:32	3600	0
2019-08-01	20:30:32	3610	0
2019-08-01	20:40:32	3620	0
2019-08-01	20:50:32	3630	0
2019-08-01	21:00:32	3640	0
2019-08-01	21:10:32	3650	0
2019-08-01	21:20:32	3660	0
2019-08-01	21:30:32	3670	0
2019-08-01	21:40:32	3680	0
2019-08-01	21:50:32	3690	0
2019-08-01	22:00:32	3700	0
2019-08-01	22:10:32	3710	0
2019-08-01	22:20:32	3720	0
2019-08-01	22:30:32	3730	0
2019-08-01	22:40:32	3740	0
2019-08-01	22:50:32	3750	0
2019-08-01	23:00:32	3760	0
2019-08-01	23:10:32	3770	0
2019-08-01	23:20:32	3780	0
2019-08-01	23:30:32	3790	0
2019-08-01	23:40:32	3800	0
2019-08-01	23:50:32	3810	0
2019-08-02	00:00:32	3820	0
2019-08-02	00:10:32	3830	0
2019-08-02	00:20:32	3840	0
2019-08-02	00:30:32	3850	0
2019-08-02	00:40:32	3860	0
2019-08-02	00:50:32	3870	0
2019-08-02	01:00:32	3880	0
2019-08-02	01:10:32	3890	0
2019-08-02	01:20:32	3900	0
2019-08-02	01:30:32	3910	0
2019-08-02	01:40:32	3920	0
2019-08-02	01:50:32	3930	0
2019-08-02	02:00:32	3940	0
2019-08-02	02:10:32	3950	0
2019-08-02	02:20:32	3960	0
2019-08-02	02:30:32	3970	0
2019-08-02	02:40:32	3980	0
2019-08-02	02:50:32	3990	0
2019-08-02	03:00:32	4000	0
2019-08-02	03:10:32	4010	0
2019-08-02	03:20:32	4020	0
2019-08-02	03:30:32	4030	0
2019-08-02	03:40:32	4040	0
2019-08-02	03:50:32	4050	0
2019-08-02	04:00:32	4060	0
2019-08-02	04:10:32	4070	0
2019-08-02	04:20:32	4080	0
2019-08-02	04:30:32	4090	0
2019-08-02	04:40:32	4100	0
2019-08-02	04:50:32	4110	0
2019-08-02	05:00:32	4120	0
2019-08-02	05:10:32	4130	0
2019-08-02	05:20:32	4140	0
2019-08-02	05:30:32	4150	0
2019-08-02	05:40:32	4160	0
2019-08-02	05:50:32	4170	0
2019-08-02	06:00:32	4180	0
2019-08-02	06:10:32	4190	0
2019-08-02	06:20:32	4200	0
2019-08-02	06:30:32	4210	0
2019-08-02	06:40:32	4220	0
2019-08-02	06:50:32	4230	0
2019-08-02	07:00:32	4240	0
2019-08-02	07:10:32	4250	0
2019-08-02	07:20:32	4260	0
2019-08-02	07:30:32	4270	0
2019-08-02	07:40:32	4280	0.18
2019-08-02	07:50:32	4290	0
2019-08-02	08:00:32	4300	0
2019-08-02	08:10:32	4310	0
2019-08-02	08:20:32	4320	0
2019-08-02	08:30:32	4330	0
2019-08-02	08:40:32	4340	0
2019-08-02	08:50:32	4350	0
2019-08-02	09:00:32	4360	0
2019-08-02	09:10:32	4370	0
2019-08-02	09:20:32	4380	0
2019-08-02	09:30:32	4390	0
2019-08-02	09:40:32	4400	0
2019-08-02	09:50:32	4410	0
2019-08-02	10:00:32	4420	0
2019-08-02	10:10:32	4430	0.18
2019-08-02	10:20:32	4440	0
2019-08-02	10:30:32	4450	0
2019-08-02	10:40:32	4460	0.36
2019-08-02	10:50:32	4470	0.42
2019-08-02	11:00:32	4480	0
2019-08-02	11:10:32	4490	0.06
2019-08-02	11:20:32	4500	0.96
2019-08-02	11:30:32	4510	0.06
2019-08-02	11:40:32	4520	0.12
2019-08-02	11:50:32	4530	0.18
2019-08-02	12:00:32	4540	0.12
2019-08-02	12:10:32	4550	0.12
2019-08-02	12:20:32	4560	0.06
2019-08-02	12:30:32	4570	0.12
2019-08-02	12:40:32	4580	0.18
2019-08-02	12:50:32	4590	0.12
2019-08-02	13:00:32	4600	0.12
2019-08-02	13:10:32	4610	0.06
2019-08-02	13:20:32	4620	0.18
2019-08-02	13:30:32	4630	0.3
2019-08-02	13:40:32	4640	0.12
2019-08-02	13:50:32	4650	0.18
2019-08-02	14:00:32	4660	0.24
2019-08-02	14:10:32	4670	0.18
2019-08-02	14:20:32	4680	0.24
2019-08-02	14:30:32	4690	0.24
2019-08-02	14:40:32	4700	0.36
2019-08-02	14:50:32	4710	0.36
2019-08-02	15:00:32	4720	4.98
2019-08-02	15:10:32	4730	0.12
2019-08-02	15:20:32	4740	0.24
2019-08-02	15:30:32	4750	0.42
2019-08-02	15:40:32	4760	0.18
2019-08-02	15:50:32	4770	0
2019-08-02	16:00:32	4780	0
2019-08-02	16:10:32	4790	0
2019-08-02	16:20:32	4800	0
2019-08-02	16:30:32	4810	0
2019-08-02	16:40:32	4820	0
2019-08-02	16:50:32	4830	0
2019-08-02	17:00:32	4840	0
2019-08-02	17:10:32	4850	0.12
2019-08-02	17:20:32	4860	0.18
2019-08-02	17:30:32	4870	0.24
2019-08-02	17:40:32	4880	0.18
2019-08-02	17:50:32	4890	0.42
2019-08-02	18:00:32	4900	0.12
2019-08-02	18:10:32	4910	0.12
2019-08-02	18:20:32	4920	0.12
2019-08-02	18:30:32	4930	0.06
2019-08-02	18:40:32	4940	0.06
2019-08-02	18:50:32	4950	0.06
2019-08-02	19:00:32	4960	0
2019-08-02	19:10:32	4970	0
2019-08-02	19:20:32	4980	0
2019-08-02	19:30:32	4990	0
2019-08-02	19:40:32	5000	0
2019-08-02	19:50:32	5010	0
2019-08-02	20:00:32	5020	0
2019-08-02	20:10:32	5030	0
2019-08-02	20:20:32	5040	0
2019-08-02	20:30:32	5050	0
2019-08-02	20:40:32	5060	0
2019-08-02	20:50:32	5070	0
2019-08-02	21:00:32	5080	0
2019-08-02	21:10:32	5090	0
2019-08-02	21:20:32	5100	0
2019-08-02	21:30:32	5110	0
2019-08-02	21:40:32	5120	0
2019-08-02	21:50:32	5130	0
2019-08-02	22:00:32	5140	0
2019-08-02	22:10:32	5150	0
2019-08-02	22:20:32	5160	0
2019-08-02	22:30:32	5170	0
2019-08-02	22:40:32	5180	0
2019-08-02	22:50:32	5190	0
2019-08-02	23:00:32	5200	0
2019-08-02	23:10:32	5210	0
2019-08-02	23:20:32	5220	0
2019-08-02	23:30:32	5230	0
2019-08-02	23:40:32	5240	0
2019-08-02	23:50:32	5250	0
2019-08-03	00:00:32	5260	0
2019-08-03	00:10:32	5270	0
2019-08-03	00:20:32	5280	0
2019-08-03	00:30:32	5290	0
2019-08-03	00:40:32	5300	0
2019-08-03	00:50:32	5310	0
2019-08-03	01:00:32	5320	0
2019-08-03	01:10:32	5330	0
2019-08-03	01:20:32	5340	0
2019-08-03	01:30:32	5350	0
2019-08-03	01:40:32	5360	0
2019-08-03	01:50:32	5370	0
2019-08-03	02:00:32	5380	0
2019-08-03	02:10:32	5390	0
2019-08-03	02:20:32	5400	0
2019-08-03	02:30:32	5410	0
2019-08-03	02:40:32	5420	0
2019-08-03	02:50:32	5430	0
2019-08-03	03:00:32	5440	0
2019-08-03	03:10:32	5450	0
2019-08-03	03:20:32	5460	0
2019-08-03	03:30:32	5470	0
2019-08-03	03:40:32	5480	0
2019-08-03	03:50:32	5490	0
2019-08-03	04:00:32	5500	0
2019-08-03	04:10:32	5510	0
2019-08-03	04:20:32	5520	0
2019-08-03	04:30:32	5530	0
2019-08-03	04:40:32	5540	0
2019-08-03	04:50:32	5550	0
2019-08-03	05:00:32	5560	0
2019-08-03	05:10:32	5570	0
2019-08-03	05:20:32	5580	0
2019-08-03	05:30:32	5590	0
2019-08-03	05:40:32	5600	0
2019-08-03	05:50:32	5610	0
2019-08-03	06:00:32	5620	0
2019-08-03	06:10:32	5630	0
2019-08-03	06:20:32	5640	0
2019-08-03	06:30:32	5650	0
2019-08-03	06:40:32	5660	0
2019-08-03	06:50:32	5670	0
2019-08-03	07:00:32	5680	0
2019-08-03	07:10:32	5690	0
2019-08-03	07:20:32	5700	0
2019-08-03	07:30:32	5710	0
2019-08-03	07:40:32	5720	0
2019-08-03	07:50:32	5730	0.06
2019-08-03	08:00:32	5740	0
2019-08-03	08:10:32	5750	0
2019-08-03	08:20:32	5760	0.12
2019-08-03	08:30:32	5770	0.12
2019-08-03	08:40:32	5780	0.06
2019-08-03	08:50:32	5790	11.52
2019-08-03	09:00:32	5800	27.36
2019-08-03	09:10:32	5810	29.4
2019-08-03	09:20:32	5820	570.54
2019-08-03	09:30:32	5830	91.2
2019-08-03	09:40:32	5840	46.5
2019-08-03	09:50:32	5850	43.08
2019-08-03	10:00:32	5860	43.44
2019-08-03	10:10:32	5870	59.7
2019-08-03	10:20:32	5880	44.76
2019-08-03	10:30:32	5890	67.32
2019-08-03	10:40:32	5900	81.3
2019-08-03	10:50:32	5910	80.22
2019-08-03	11:00:32	5920	93.36
2019-08-03	11:10:32	5930	83.22
2019-08-03	11:20:32	5940	370.62
2019-08-03	11:30:32	5950	600
2019-08-03	11:40:32	5960	503.22
2019-08-03	11:50:32	5970	663.48
2019-08-03	12:00:32	5980	532.74
2019-08-03	12:10:32	5990	657.18
2019-08-03	12:20:32	6000	674.64
2019-08-03	12:30:32	6010	704.52
2019-08-03	12:40:32	6020	729
2019-08-03	12:50:32	6030	648.78
2019-08-03	13:00:32	6040	492.42
2019-08-03	13:10:32	6050	608.82
2019-08-03	13:20:32	6060	738.72
2019-08-03	13:30:32	6070	672.54
2019-08-03	13:40:32	6080	674.82
2019-08-03	13:50:32	6090	335.22
2019-08-03	14:00:32	6100	283.08
2019-08-03	14:10:32	6110	277.92
2019-08-03	14:20:32	6120	295.62
2019-08-03	14:30:32	6130	406.38
2019-08-03	14:40:32	6140	510.84
2019-08-03	14:50:32	6150	445.08
2019-08-03	15:00:32	6160	539.04
2019-08-03	15:10:32	6170	306.6
2019-08-03	15:20:32	6180	183.72
2019-08-03	15:30:32	6190	148.14
2019-08-03	15:40:32	6200	139.02
2019-08-03	15:50:32	6210	149.94
2019-08-03	16:00:32	6220	148.44
2019-08-03	16:10:32	6230	153.36
2019-08-03	16:20:32	6240	132.6
2019-08-03	16:30:32	6250	163.02
2019-08-03	16:40:32	6260	159.54
2019-08-03	16:50:32	6270	181.98
2019-08-03	17:00:32	6280	208.56
2019-08-03	17:10:32	6290	276.06
2019-08-03	17:20:32	6300	244.14
2019-08-03	17:30:32	6310	130.08
2019-08-03	17:40:32	6320	85.26
2019-08-03	17:50:32	6330	70.68
2019-08-03	18:00:32	6340	65.16
2019-08-03	18:10:32	6350	61.5
2019-08-03	18:20:32	6360	56.94
2019-08-03	18:30:32	6370	47.82
2019-08-03	18:40:32	6380	38.28
2019-08-03	18:50:32	6390	26.46
2019-08-03	19:00:32	6400	14.58
2019-08-03	19:10:32	6410	7.56
2019-08-03	19:20:32	6420	3.42
2019-08-03	19:30:32	6430	0.9
2019-08-03	19:40:32	6440	0
2019-08-03	19:50:32	6450	0
2019-08-03	20:00:32	6460	0
2019-08-03	20:10:32	6470	0
2019-08-03	20:20:32	6480	0
2019-08-03	20:30:32	6490	0
2019-08-03	20:40:32	6500	0
2019-08-03	20:50:32	6510	0
2019-08-03	21:00:32	6520	0
2019-08-03	21:10:32	6530	0
2019-08-03	21:20:32	6540	0
2019-08-03	21:30:32	6550	0
2019-08-03	21:40:32	6560	0
2019-08-03	21:50:32	6570	0
2019-08-03	22:00:32	6580	0
2019-08-03	22:10:32	6590	1.02
2019-08-03	22:20:32	6600	0
2019-08-03	22:30:32	6610	0
2019-08-03	22:40:32	6620	0
2019-08-03	22:50:32	6630	0
2019-08-03	23:00:32	6640	0
2019-08-03	23:10:32	6650	0
2019-08-03	23:20:32	6660	0
2019-08-03	23:30:32	6670	0
2019-08-03	23:40:32	6680	0
2019-08-03	23:50:32	6690	0
2019-08-04	00:00:32	6700	0
2019-08-04	00:10:32	6710	0
2019-08-04	00:20:32	6720	0
2019-08-04	00:30:32	6730	0
2019-08-04	00:40:32	6740	0
2019-08-04	00:50:32	6750	0
2019-08-04	01:00:32	6760	0
2019-08-04	01:10:32	6770	0
2019-08-04	01:20:32	6780	0
2019-08-04	01:30:32	6790	0
2019-08-04	01:40:32	6800	0
2019-08-04	01:50:32	6810	0
2019-08-04	02:00:32	6820	0
2019-08-04	02:10:32	6830	0
2019-08-04	02:20:32	6840	0
2019-08-04	02:30:32	6850	0
2019-08-04	02:40:32	6860	0
2019-08-04	02:50:32	6870	0
2019-08-04	03:00:32	6880	0
2019-08-04	03:10:32	6890	0
2019-08-04	03:20:32	6900	0
2019-08-04	03:30:32	6910	0
2019-08-04	03:40:32	6920	0
2019-08-04	03:50:32	6930	0
2019-08-04	04:00:32	6940	0
2019-08-04	04:10:32	6950	0
2019-08-04	04:20:32	6960	0
2019-08-04	04:30:32	6970	0
2019-08-04	04:40:32	6980	0
2019-08-04	04:50:32	6990	0
2019-08-04	05:00:32	7000	0
2019-08-04	05:10:32	7010	0
2019-08-04	05:20:32	7020	0
2019-08-04	05:30:32	7030	0
2019-08-04	05:40:32	7040	0
2019-08-04	05:50:32	7050	0
2019-08-04	06:00:32	7060	0
2019-08-04	06:10:32	7070	0
2019-08-04	06:20:32	7080	0
2019-08-04	06:30:32	7090	0.06
2019-08-04	06:40:32	7100	0.9
2019-08-04	06:50:32	7110	2.76
2019-08-04	07:00:32	7120	6.3
2019-08-04	07:10:32	7130	6.54
2019-08-04	07:20:32	7140	8.22
2019-08-04	07:30:32	7150	10.38
2019-08-04	07:40:32	7160	12.12
2019-08-04	07:50:32	7170	14.1
2019-08-04	08:00:32	7180	17.1
2019-08-04	08:10:32	7190	18.72
2019-08-04	08:20:32	7200	18.78
2019-08-04	08:30:32	7210	20.1
2019-08-04	08:40:32	7220	21.18
2019-08-04	08:50:32	7230	23.94
2019-08-04	09:00:32	7240	25.08
2019-08-04	09:10:32	7250	21.36
2019-08-04	09:20:32	7260	25.8
2019-08-04	09:30:32	7270	25.02
2019-08-04	09:40:32	7280	30.36
2019-08-04	09:50:32	7290	27.18
2019-08-04	10:00:32	7300	28.68
2019-08-04	10:10:32	7310	31.5
2019-08-04	10:20:32	7320	28.8
2019-08-04	10:30:32	7330	25.02
2019-08-04	10:40:32	7340	26.94
2019-08-04	10:50:32	7350	27.42
2019-08-04	11:00:32	7360	27.66
2019-08-04	11:10:32	7370	24.48
2019-08-04	11:20:32	7380	27.96
2019-08-04	11:30:32	7390	28.74
2019-08-04	11:40:32	7400	29.88
2019-08-04	11:50:32	7410	28.26
2019-08-04	12:00:32	7420	27.06
2019-08-04	12:10:32	7430	25.32
2019-08-04	12:20:32	7440	27.24
2019-08-04	12:30:32	7450	26.88
2019-08-04	12:40:32	7460	28.74
2019-08-04	12:50:32	7470	31.68
2019-08-04	13:00:32	7480	33
2019-08-04	13:10:32	7490	30.48
2019-08-04	13:20:32	7500	30
2019-08-04	13:30:32	7510	31.56
2019-08-04	13:40:32	7520	29.1
2019-08-04	13:50:32	7530	32.58
2019-08-04	14:00:32	7540	32.34
2019-08-04	14:10:32	7550	33.24
2019-08-04	14:20:32	7560	43.8
2019-08-04	14:30:32	7570	58.74
2019-08-04	14:40:32	7580	68.04
2019-08-04	14:50:32	7590	75.3
2019-08-04	15:00:32	7600	89.88
2019-08-04	15:10:32	7610	116.34
2019-08-04	15:20:32	7620	145.08
2019-08-04	15:30:32	7630	124.86
2019-08-04	15:40:32	7640	140.04
2019-08-04	15:50:32	7650	167.76
2019-08-04	16:00:32	7660	138.6
2019-08-04	16:10:32	7670	130.02
2019-08-04	16:20:32	7680	115.08
2019-08-04	16:30:32	7690	160.74
2019-08-04	16:40:32	7700	178.68
2019-08-04	16:50:32	7710	182.16
2019-08-04	17:00:32	7720	164.22
2019-08-04	17:10:32	7730	115.56
2019-08-04	17:20:32	7740	80.94
2019-08-04	17:30:32	7750	92.46
2019-08-04	17:40:32	7760	64.02
2019-08-04	17:50:32	7770	37.5
2019-08-04	18:00:32	7780	46.14
2019-08-04	18:10:32	7790	33.78
2019-08-04	18:20:32	7800	25.98
2019-08-04	18:30:32	7810	21.3
2019-08-04	18:40:32	7820	17.1
2019-08-04	18:50:32	7830	13.8
2019-08-04	19:00:32	7840	10.68
2019-08-04	19:10:32	7850	8.34
2019-08-04	19:20:32	7860	4.2
2019-08-04	19:30:32	7870	0.78
2019-08-04	19:40:32	7880	0
2019-08-04	19:50:32	7890	0
2019-08-04	20:00:32	7900	0
2019-08-04	20:10:32	7910	0
2019-08-04	20:20:32	7920	0
2019-08-04	20:30:32	7930	0
2019-08-04	20:40:32	7940	0
2019-08-04	20:50:32	7950	0
2019-08-04	21:00:32	7960	0
2019-08-04	21:10:32	7970	0
2019-08-04	21:20:32	7980	0
2019-08-04	21:30:32	7990	0
2019-08-04	21:40:32	8000	0
2019-08-04	21:50:32	8010	0
2019-08-04	22:00:32	8020	0
2019-08-04	22:10:32	8030	0
2019-08-04	22:20:32	8040	0
2019-08-04	22:30:32	8050	0
2019-08-04	22:40:32	8060	0
2019-08-04	22:50:32	8070	0
2019-08-04	23:00:32	8080	0
2019-08-04	23:10:32	8090	0
2019-08-04	23:20:32	8100	0
2019-08-04	23:30:32	8110	0
2019-08-04	23:40:32	8120	0
2019-08-04	23:50:32	8130	0
2019-08-05	00:00:32	8140	0
2019-08-05	00:10:32	8150	0
2019-08-05	00:20:32	8160	0
2019-08-05	00:30:32	8170	0
2019-08-05	00:40:32	8180	0
2019-08-05	00:50:32	8190	0
2019-08-05	01:00:32	8200	0
2019-08-05	01:10:32	8210	0
2019-08-05	01:20:32	8220	0
2019-08-05	01:30:32	8230	0
2019-08-05	01:40:32	8240	0
2019-08-05	01:50:32	8250	0
2019-08-05	02:00:32	8260	0
2019-08-05	02:10:32	8270	0
2019-08-05	02:20:32	8280	0
2019-08-05	02:30:32	8290	0
2019-08-05	02:40:32	8300	0
2019-08-05	02:50:32	8310	0
2019-08-05	03:00:32	8320	0
2019-08-05	03:10:32	8330	0
2019-08-05	03:20:32	8340	0
2019-08-05	03:30:32	8350	0
2019-08-05	03:40:32	8360	0
2019-08-05	03:50:32	8370	0
2019-08-05	04:00:32	8380	0
2019-08-05	04:10:32	8390	0
2019-08-05	04:20:32	8400	0
2019-08-05	04:30:32	8410	0
2019-08-05	04:40:32	8420	0
2019-08-05	04:50:32	8430	0
2019-08-05	05:00:32	8440	0
2019-08-05	05:10:32	8450	0
2019-08-05	05:20:32	8460	0
2019-08-05	05:30:32	8470	0
2019-08-05	05:40:32	8480	0
2019-08-05	05:50:32	8490	0
2019-08-05	06:00:32	8500	0
2019-08-05	06:10:32	8510	0
2019-08-05	06:20:32	8520	0
2019-08-05	06:30:32	8530	0.24
2019-08-05	06:40:32	8540	1.26
2019-08-05	06:50:32	8550	9.12
2019-08-05	07:00:32	8560	10.44
2019-08-05	07:10:32	8570	10.86
2019-08-05	07:20:32	8580	16.86
2019-08-05	07:30:32	8590	17.4
2019-08-05	07:40:32	8600	18.54
2019-08-05	07:50:32	8610	20.46
2019-08-05	08:00:32	8620	22.26
2019-08-05	08:10:32	8630	23.82
2019-08-05	08:20:32	8640	24.72
2019-08-05	08:30:32	8650	25.74
2019-08-05	08:40:32	8660	26.58
2019-08-05	08:50:32	8670	29.22
2019-08-05	09:00:32	8680	30.78
2019-08-05	09:10:32	8690	31.98
2019-08-05	09:20:32	8700	29.88
2019-08-05	09:30:32	8710	30.84
2019-08-05	09:40:32	8720	31.56
2019-08-05	09:50:32	8730	33.84
2019-08-05	10:00:32	8740	36.42
2019-08-05	10:10:32	8750	37.08
2019-08-05	10:20:32	8760	35.22
2019-08-05	10:30:32	8770	33.48
2019-08-05	10:40:32	8780	32.82
2019-08-05	10:50:32	8790	32.88
2019-08-05	11:00:32	8800	33.12
2019-08-05	11:10:32	8810	32.28
2019-08-05	11:20:32	8820	32.46
2019-08-05	11:30:32	8830	32.34
2019-08-05	11:40:32	8840	32.52
2019-08-05	11:50:32	8850	33.42
2019-08-05	12:00:32	8860	33.06
2019-08-05	12:10:32	8870	33.9
2019-08-05	12:20:32	8880	34.38
2019-08-05	12:30:32	8890	32.52
2019-08-05	12:40:32	8900	35.58
2019-08-05	12:50:32	8910	39.36
2019-08-05	13:00:32	8920	40.74
2019-08-05	13:10:32	8930	38.76
2019-08-05	13:20:32	8940	39.78
2019-08-05	13:30:32	8950	44.4
2019-08-05	13:40:32	8960	52.02
2019-08-05	13:50:32	8970	68.22
2019-08-05	14:00:32	8980	78.42
2019-08-05	14:10:32	8990	83.1
2019-08-05	14:20:32	9000	91.5
2019-08-05	14:30:32	9010	111.84
2019-08-05	14:40:32	9020	107.46
2019-08-05	14:50:32	9030	128.52
2019-08-05	15:00:32	9040	153.3
2019-08-05	15:10:32	9050	214.2
2019-08-05	15:20:32	9060	239.64
2019-08-05	15:30:32	9070	211.44
2019-08-05	15:40:32	9080	241.38
2019-08-05	15:50:32	9090	265.08
2019-08-05	16:00:32	9100	238.56
2019-08-05	16:10:32	9110	217.68
2019-08-05	16:20:32	9120	198.24
2019-08-05	16:30:32	9130	216.78
2019-08-05	16:40:32	9140	200.1
2019-08-05	16:50:32	9150	163.5
2019-08-05	17:00:32	9160	120.06
2019-08-05	17:10:32	9170	99.3
2019-08-05	17:20:32	9180	60.3
2019-08-05	17:30:32	9190	36.36
2019-08-05	17:40:32	9200	28.14
2019-08-05	17:50:32	9210	22.98
2019-08-05	18:00:32	9220	18.84
2019-08-05	18:10:32	9230	16.32
2019-08-05	18:20:32	9240	14.04
2019-08-05	18:30:32	9250	11.82
2019-08-05	18:40:32	9260	9.42
2019-08-05	18:50:32	9270	6.72
2019-08-05	19:00:32	9280	4.08
2019-08-05	19:10:32	9290	1.92
2019-08-05	19:20:32	9300	0.48
2019-08-05	19:30:32	9310	0
2019-08-05	19:40:32	9320	0
2019-08-05	19:50:32	9330	0
2019-08-05	20:00:32	9340	0
2019-08-05	20:10:32	9350	0
2019-08-05	20:20:32	9360	0
2019-08-05	20:30:32	9370	0
2019-08-05	20:40:32	9380	0
2019-08-05	20:50:32	9390	0
2019-08-05	21:00:32	9400	0
2019-08-05	21:10:32	9410	0
2019-08-05	21:20:32	9420	0
2019-08-05	21:30:32	9430	0
2019-08-05	21:40:32	9440	0
2019-08-05	21:50:32	9450	0
2019-08-05	22:00:32	9460	0
2019-08-05	22:10:32	9470	0
2019-08-05	22:20:32	9480	0
2019-08-05	22:30:32	9490	0
2019-08-05	22:40:32	9500	0
2019-08-05	22:50:32	9510	0
2019-08-05	23:00:32	9520	0
2019-08-05	23:10:32	9530	0
2019-08-05	23:20:32	9540	0
2019-08-05	23:30:32	9550	0
2019-08-05	23:40:32	9560	0
2019-08-05	23:50:32	9570	0
2019-08-06	00:00:32	9580	0
2019-08-06	00:10:32	9590	0
2019-08-06	00:20:32	9600	0
2019-08-06	00:30:32	9610	0
2019-08-06	00:40:32	9620	0
2019-08-06	00:50:32	9630	0
2019-08-06	01:00:32	9640	0
2019-08-06	01:10:32	9650	0
2019-08-06	01:20:32	9660	0
2019-08-06	01:30:32	9670	0
2019-08-06	01:40:32	9680	0
2019-08-06	01:50:32	9690	0
2019-08-06	02:00:32	9700	0
2019-08-06	02:10:32	9710	0
2019-08-06	02:20:32	9720	0
2019-08-06	02:30:32	9730	0
2019-08-06	02:40:32	9740	0
2019-08-06	02:50:32	9750	0
2019-08-06	03:00:32	9760	0
2019-08-06	03:10:32	9770	0
2019-08-06	03:20:32	9780	0
2019-08-06	03:30:32	9790	0
2019-08-06	03:40:32	9800	0
2019-08-06	03:50:32	9810	0
2019-08-06	04:00:32	9820	0
2019-08-06	04:10:32	9830	0
2019-08-06	04:20:32	9840	0
2019-08-06	04:30:32	9850	0
2019-08-06	04:40:32	9860	0
2019-08-06	04:50:32	9870	0
2019-08-06	05:00:32	9880	0
2019-08-06	05:10:32	9890	0
2019-08-06	05:20:32	9900	0
2019-08-06	05:30:32	9910	0
2019-08-06	05:40:32	9920	0
2019-08-06	05:50:32	9930	0
2019-08-06	06:00:32	9940	0
2019-08-06	06:10:32	9950	0
2019-08-06	06:20:32	9960	0
2019-08-06	06:30:32	9970	0.78
2019-08-06	06:40:32	9980	2.64
2019-08-06	06:50:32	9990	5.94
2019-08-06	07:00:32	10000	11.34
2019-08-06	07:10:32	10010	16.14
2019-08-06	07:20:32	10020	22.02
2019-08-06	07:30:32	10030	24.9
2019-08-06	07:40:32	10040	26.88
2019-08-06	07:50:32	10050	32.58
2019-08-06	08:00:32	10060	31.92
2019-08-06	08:10:32	10070	32.88
2019-08-06	08:20:32	10080	32.64
2019-08-06	08:30:32	10090	33.72
2019-08-06	08:40:32	10100	34.56
2019-08-06	08:50:32	10110	35.82
2019-08-06	09:00:32	10120	37.56
2019-08-06	09:10:32	10130	39.6
2019-08-06	09:20:32	10140	41.64
2019-08-06	09:30:32	10150	41.22
2019-08-06	09:40:32	10160	38.94
2019-08-06	09:50:32	10170	43.86
2019-08-06	10:00:32	10180	41.82
2019-08-06	10:10:32	10190	43.98
2019-08-06	10:20:32	10200	44.7
2019-08-06	10:30:32	10210	45.12
2019-08-06	10:40:32	10220	45.18
2019-08-06	10:50:32	10230	44.88
2019-08-06	11:00:32	10240	44.76
2019-08-06	11:10:32	10250	43.44
2019-08-06	11:20:32	10260	42.54
2019-08-06	11:30:32	10270	42.24
2019-08-06	11:40:32	10280	43.02
2019-08-06	11:50:32	10290	44.88
2019-08-06	12:00:32	10300	44.46
2019-08-06	12:10:32	10310	46.26
2019-08-06	12:20:32	10320	45.12
2019-08-06	12:30:32	10330	44.94
2019-08-06	12:40:32	10340	48.48
2019-08-06	12:50:32	10350	53.76
2019-08-06	13:00:32	10360	58.62
2019-08-06	13:10:32	10370	53.04
2019-08-06	13:20:32	10380	52.44
2019-08-06	13:30:32	10390	55.5
2019-08-06	13:40:32	10400	54.48
2019-08-06	13:50:32	10410	58.8
2019-08-06	14:00:32	10420	63.48
2019-08-06	14:10:32	10430	64.32
2019-08-06	14:20:32	10440	69.3
2019-08-06	14:30:32	10450	81.72
2019-08-06	14:40:32	10460	103.32
2019-08-06	14:50:32	10470	115.02
2019-08-06	15:00:32	10480	141.54
2019-08-06	15:10:32	10490	194.52
2019-08-06	15:20:32	10500	234.6
2019-08-06	15:30:32	10510	199.44
2019-08-06	15:40:32	10520	225.6
2019-08-06	15:50:32	10530	156.6
2019-08-06	16:00:32	10540	140.82
2019-08-06	16:10:32	10550	47.1
2019-08-06	16:20:32	10560	52.74
2019-08-06	16:30:32	10570	47.64
2019-08-06	16:40:32	10580	54.66
2019-08-06	16:50:32	10590	52.02
2019-08-06	17:00:32	10600	42.24
2019-08-06	17:10:32	10610	37.02
2019-08-06	17:20:32	10620	31.68
2019-08-06	17:30:32	10630	28.62
2019-08-06	17:40:32	10640	30
2019-08-06	17:50:32	10650	28.44
2019-08-06	18:00:32	10660	23.7
2019-08-06	18:10:32	10670	21
2019-08-06	18:20:32	10680	20.04
2019-08-06	18:30:32	10690	16.74
2019-08-06	18:40:32	10700	11.22
2019-08-06	18:50:32	10710	7.02
2019-08-06	19:00:32	10720	5.04
2019-08-06	19:10:32	10730	3.3
2019-08-06	19:20:32	10740	2.04
2019-08-06	19:30:32	10750	0.36
2019-08-06	19:40:32	10760	0.06
2019-08-06	19:50:32	10770	0
2019-08-06	20:00:32	10780	0
2019-08-06	20:10:32	10790	0
2019-08-06	20:20:32	10800	0
2019-08-06	20:30:32	10810	0
2019-08-06	20:40:32	10820	0
2019-08-06	20:50:32	10830	0
2019-08-06	21:00:32	10840	0
2019-08-06	21:10:32	10850	0
2019-08-06	21:20:32	10860	0
2019-08-06	21:30:32	10870	0
2019-08-06	21:40:32	10880	0
2019-08-06	21:50:32	10890	0
2019-08-06	22:00:32	10900	0
2019-08-06	22:10:32	10910	0
2019-08-06	22:20:32	10920	0
2019-08-06	22:30:32	10930	0
2019-08-06	22:40:32	10940	0
2019-08-06	22:50:32	10950	0
2019-08-06	23:00:32	10960	0
2019-08-06	23:10:32	10970	0
2019-08-06	23:20:32	10980	0
2019-08-06	23:30:32	10990	0
2019-08-06	23:40:32	11000	0
2019-08-06	23:50:32	11010	0
2019-08-07	00:00:32	11020	0
2019-08-07	00:10:32	11030	0
2019-08-07	00:20:32	11040	0
2019-08-07	00:30:32	11050	0
2019-08-07	00:40:32	11060	0
2019-08-07	00:50:32	11070	0
2019-08-07	01:00:32	11080	0
2019-08-07	01:10:32	11090	0
2019-08-07	01:20:32	11100	0
2019-08-07	01:30:32	11110	0
2019-08-07	01:40:32	11120	0
2019-08-07	01:50:32	11130	0
2019-08-07	02:00:32	11140	0
2019-08-07	02:10:32	11150	0
2019-08-07	02:20:32	11160	0
2019-08-07	02:30:32	11170	0
2019-08-07	02:40:32	11180	0
2019-08-07	02:50:32	11190	0
2019-08-07	03:00:32	11200	0
2019-08-07	03:10:32	11210	0
2019-08-07	03:20:32	11220	0
2019-08-07	03:30:32	11230	0
2019-08-07	03:40:32	11240	0
2019-08-07	03:50:32	11250	0
2019-08-07	04:00:32	11260	0
2019-08-07	04:10:32	11270	0
2019-08-07	04:20:32	11280	0
2019-08-07	04:30:32	11290	0
2019-08-07	04:40:32	11300	0
2019-08-07	04:50:32	11310	0
2019-08-07	05:00:32	11320	0
2019-08-07	05:10:32	11330	0
2019-08-07	05:20:32	11340	0
2019-08-07	05:30:32	11350	0
2019-08-07	05:40:32	11360	0
2019-08-07	05:50:32	11370	0
2019-08-07	06:00:32	11380	0
2019-08-07	06:10:32	11390	0
2019-08-07	06:20:32	11400	0
2019-08-07	06:30:32	11410	0.54
2019-08-07	06:40:32	11420	2.16
2019-08-07	06:50:32	11430	4.62
2019-08-07	07:00:32	11440	7.38
2019-08-07	07:10:32	11450	10.02
2019-08-07	07:20:32	11460	12.3
2019-08-07	07:30:32	11470	14.7
2019-08-07	07:40:32	11480	17.34
2019-08-07	07:50:32	11490	19.68
2019-08-07	08:00:32	11500	21.18
2019-08-07	08:10:32	11510	23.64
2019-08-07	08:20:32	11520	25.02
2019-08-07	08:30:32	11530	26.64
2019-08-07	08:40:32	11540	28.26
2019-08-07	08:50:32	11550	29.58
2019-08-07	09:00:32	11560	31.26
2019-08-07	09:10:32	11570	36.9
2019-08-07	09:20:32	11580	34.5
2019-08-07	09:30:32	11590	34.02
2019-08-07	09:40:32	11600	33.84
2019-08-07	09:50:32	11610	34.32
2019-08-07	10:00:32	11620	34.8
2019-08-07	10:10:32	11630	34.98
2019-08-07	10:20:32	11640	16.62
2019-08-07	10:30:32	11650	13.38
2019-08-07	10:40:32	11660	33.54
2019-08-07	10:50:32	11670	33.06
2019-08-07	11:00:32	11680	200.1
2019-08-07	11:10:32	11690	390.3
2019-08-07	11:20:32	11700	489.42
2019-08-07	11:30:32	11710	512.28
2019-08-07	11:40:32	11720	494.4
2019-08-07	11:50:32	11730	580.26
2019-08-07	12:00:32	11740	581.94
2019-08-07	12:10:32	11750	603.66
2019-08-07	12:20:32	11760	589.02
2019-08-07	12:30:32	11770	590.88
2019-08-07	12:40:32	11780	611.46
2019-08-07	12:50:32	11790	629.7
2019-08-07	13:00:32	11800	581.1
2019-08-07	13:10:32	11810	649.86
2019-08-07	13:20:32	11820	632.52
2019-08-07	13:30:32	11830	629.28
2019-08-07	13:40:32	11840	619.32
2019-08-07	13:50:32	11850	618.78
2019-08-07	14:00:32	11860	624.72
2019-08-07	14:10:32	11870	541.8
2019-08-07	14:20:32	11880	560.82
2019-08-07	14:30:32	11890	577.5
2019-08-07	14:40:32	11900	518.7
2019-08-07	14:50:32	11910	355.86
2019-08-07	15:00:32	11920	475.32
2019-08-07	15:10:32	11930	289.02
2019-08-07	15:20:32	11940	194.34
2019-08-07	15:30:32	11950	260.58
2019-08-07	15:40:32	11960	151.74
2019-08-07	15:50:32	11970	95.58
2019-08-07	16:00:32	11980	79.68
2019-08-07	16:10:32	11990	69.66
2019-08-07	16:20:32	12000	52.86
2019-08-07	16:30:32	12010	42.78
2019-08-07	16:40:32	12020	14.22
2019-08-07	16:50:32	12030	24.96
2019-08-07	17:00:32	12040	32.34
2019-08-07	17:10:32	12050	1.02
2019-08-07	17:20:32	12060	1.02
2019-08-07	17:30:32	12070	1.08
2019-08-07	17:40:32	12080	4.08
2019-08-07	17:50:32	12090	0.66
2019-08-07	18:00:32	12100	0.72
2019-08-07	18:10:32	12110	0.66
2019-08-07	18:20:32	12120	0.6
2019-08-07	18:30:32	12130	0.6
2019-08-07	18:40:32	12140	0.96
2019-08-07	18:50:32	12150	0.6
2019-08-07	19:00:32	12160	0.36
2019-08-07	19:10:32	12170	0.06
2019-08-07	19:20:32	12180	0
2019-08-07	19:30:32	12190	0
2019-08-07	19:40:32	12200	0
2019-08-07	19:50:32	12210	0
2019-08-07	20:00:32	12220	0
2019-08-07	20:10:32	12230	0
2019-08-07	20:20:32	12240	0
2019-08-07	20:30:32	12250	0
2019-08-07	20:40:32	12260	0
2019-08-07	20:50:32	12270	0
2019-08-07	21:00:32	12280	0
2019-08-07	21:10:32	12290	0
2019-08-07	21:20:32	12300	0
2019-08-07	21:30:32	12310	0
2019-08-07	21:40:32	12320	0
2019-08-07	21:50:32	12330	0
2019-08-07	22:00:32	12340	0
2019-08-07	22:10:32	12350	0
2019-08-07	22:20:32	12360	0
2019-08-07	22:30:32	12370	0
2019-08-07	22:40:32	12380	0
2019-08-07	22:50:32	12390	0
2019-08-07	23:00:32	12400	0
2019-08-07	23:10:32	12410	0
2019-08-07	23:20:32	12420	0
2019-08-07	23:30:32	12430	0
2019-08-07	23:40:32	12440	0
2019-08-07	23:50:32	12450	0
2019-08-08	00:00:32	12460	0
2019-08-08	00:10:32	12470	0
2019-08-08	00:20:32	12480	0
2019-08-08	00:30:32	12490	0
2019-08-08	00:40:32	12500	0
2019-08-08	00:50:32	12510	0
2019-08-08	01:00:32	12520	0
2019-08-08	01:10:32	12530	0
2019-08-08	01:20:32	12540	0
2019-08-08	01:30:32	12550	0
2019-08-08	01:40:32	12560	0
2019-08-08	01:50:32	12570	0
2019-08-08	02:00:32	12580	0
2019-08-08	02:10:32	12590	0
2019-08-08	02:20:32	12600	0
2019-08-08	02:30:32	12610	0
2019-08-08	02:40:32	12620	0
2019-08-08	02:50:32	12630	0
2019-08-08	03:00:32	12640	0
2019-08-08	03:10:32	12650	0
2019-08-08	03:20:32	12660	0
2019-08-08	03:30:32	12670	0
2019-08-08	03:40:32	12680	0
2019-08-08	03:50:32	12690	0
2019-08-08	04:00:32	12700	0
2019-08-08	04:10:32	12710	0
2019-08-08	04:20:32	12720	0
2019-08-08	04:30:32	12730	0
2019-08-08	04:40:32	12740	0
2019-08-08	04:50:32	12750	0
2019-08-08	05:00:32	12760	0
2019-08-08	05:10:32	12770	0
2019-08-08	05:20:32	12780	0
2019-08-08	05:30:32	12790	0
2019-08-08	05:40:32	12800	0
2019-08-08	05:50:32	12810	0
2019-08-08	06:00:32	12820	0
2019-08-08	06:10:32	12830	0
2019-08-08	06:20:32	12840	0
2019-08-08	06:30:32	12850	0
2019-08-08	06:40:32	12860	0
2019-08-08	06:50:32	12870	0.36
2019-08-08	07:00:32	12880	0.3
2019-08-08	07:10:32	12890	0.54
2019-08-08	07:20:32	12900	1.26
2019-08-08	07:30:32	12910	2.22
2019-08-08	07:40:32	12920	4.5
2019-08-08	07:50:32	12930	4.8
2019-08-08	08:00:32	12940	4.38
2019-08-08	08:10:32	12950	5.82
2019-08-08	08:20:32	12960	6.24
2019-08-08	08:30:32	12970	6.66
2019-08-08	08:40:32	12980	7.26
2019-08-08	08:50:32	12990	7.5
2019-08-08	09:00:32	13000	7.86
2019-08-08	09:10:32	13010	8.22
2019-08-08	09:20:32	13020	8.76
2019-08-08	09:30:32	13030	9.18
2019-08-08	09:40:32	13040	9.96
2019-08-08	09:50:32	13050	10.56
2019-08-08	10:00:32	13060	8.94
2019-08-08	10:10:32	13070	10.5
2019-08-08	10:20:32	13080	12.54
2019-08-08	10:30:32	13090	14.1
2019-08-08	10:40:32	13100	15.6
2019-08-08	10:50:32	13110	16.2
2019-08-08	11:00:32	13120	14.1
2019-08-08	11:10:32	13130	19.2
2019-08-08	11:20:32	13140	20.88
2019-08-08	11:30:32	13150	28.92
2019-08-08	11:40:32	13160	10.86
2019-08-08	11:50:32	13170	10.26
2019-08-08	12:00:32	13180	9.96
2019-08-08	12:10:32	13190	10.2
2019-08-08	12:20:32	13200	11.16
2019-08-08	12:30:32	13210	12.36
2019-08-08	12:40:32	13220	16.92
2019-08-08	12:50:32	13230	14.4
2019-08-08	13:00:32	13240	14.04
2019-08-08	13:10:32	13250	13.2
2019-08-08	13:20:32	13260	12.18
2019-08-08	13:30:32	13270	13.92
2019-08-08	13:40:32	13280	15.72
2019-08-08	13:50:32	13290	16.5
2019-08-08	14:00:32	13300	14.1
2019-08-08	14:10:32	13310	14.88
2019-08-08	14:20:32	13320	13.62
2019-08-08	14:30:32	13330	12.36
2019-08-08	14:40:32	13340	12.06
2019-08-08	14:50:32	13350	11.58
2019-08-08	15:00:32	13360	12.36
2019-08-08	15:10:32	13370	10.98
2019-08-08	15:20:32	13380	11.76
2019-08-08	15:30:32	13390	15.54
2019-08-08	15:40:32	13400	18.6
2019-08-08	15:50:32	13410	19.32
2019-08-08	16:00:32	13420	19.92
2019-08-08	16:10:32	13430	17.4
2019-08-08	16:20:32	13440	19.44
2019-08-08	16:30:32	13450	17.88
2019-08-08	16:40:32	13460	15.84
2019-08-08	16:50:32	13470	14.4
2019-08-08	17:00:32	13480	13.5
2019-08-08	17:10:32	13490	12.36
2019-08-08	17:20:32	13500	11.34
2019-08-08	17:30:32	13510	9.84
2019-08-08	17:40:32	13520	9.12
2019-08-08	17:50:32	13530	5.16
2019-08-08	18:00:32	13540	1.02
2019-08-08	18:10:32	13550	0.72
2019-08-08	18:20:32	13560	0.42
2019-08-08	18:30:32	13570	0.36
2019-08-08	18:40:32	13580	0.72
2019-08-08	18:50:32	13590	0.48
2019-08-08	19:00:32	13600	0.12
2019-08-08	19:10:32	13610	0
2019-08-08	19:20:32	13620	0
2019-08-08	19:30:32	13630	0
2019-08-08	19:40:32	13640	0
2019-08-08	19:50:32	13650	0
2019-08-08	20:00:32	13660	0
2019-08-08	20:10:32	13670	0
2019-08-08	20:20:32	13680	0
2019-08-08	20:30:32	13690	0
2019-08-08	20:40:32	13700	0
2019-08-08	20:50:32	13710	0
2019-08-08	21:00:32	13720	0
2019-08-08	21:10:32	13730	0
2019-08-08	21:20:32	13740	0
2019-08-08	21:30:32	13750	0
2019-08-08	21:40:32	13760	0
2019-08-08	21:50:32	13770	0
2019-08-08	22:00:32	13780	0
2019-08-08	22:10:32	13790	0
2019-08-08	22:20:32	13800	0
2019-08-08	22:30:32	13810	0
2019-08-08	22:40:32	13820	0
2019-08-08	22:50:32	13830	0
2019-08-08	23:00:32	13840	0
2019-08-08	23:10:32	13850	0
2019-08-08	23:20:32	13860	0
2019-08-08	23:30:32	13870	0
2019-08-08	23:40:32	13880	0
2019-08-08	23:50:32	13890	0
2019-08-09	00:00:32	13900	0
2019-08-09	00:10:32	13910	0
2019-08-09	00:20:32	13920	0
2019-08-09	00:30:32	13930	0
2019-08-09	00:40:32	13940	0
2019-08-09	00:50:32	13950	0
2019-08-09	01:00:32	13960	0
2019-08-09	01:10:32	13970	0
2019-08-09	01:20:32	13980	0
2019-08-09	01:30:32	13990	0
2019-08-09	01:40:32	14000	0
2019-08-09	01:50:32	14010	0
2019-08-09	02:00:32	14020	0
2019-08-09	02:10:32	14030	0
2019-08-09	02:20:32	14040	0
2019-08-09	02:30:32	14050	0
2019-08-09	02:40:32	14060	0
2019-08-09	02:50:32	14070	0
2019-08-09	03:00:32	14080	0
2019-08-09	03:10:32	14090	0
2019-08-09	03:20:32	14100	0
2019-08-09	03:30:32	14110	0
2019-08-09	03:40:32	14120	0
2019-08-09	03:50:32	14130	0
2019-08-09	04:00:32	14140	0
2019-08-09	04:10:32	14150	0
2019-08-09	04:20:32	14160	0
2019-08-09	04:30:32	14170	0
2019-08-09	04:40:32	14180	0
2019-08-09	04:50:32	14190	0
2019-08-09	05:00:32	14200	0
2019-08-09	05:10:32	14210	0
2019-08-09	05:20:32	14220	0
2019-08-09	05:30:32	14230	0
2019-08-09	05:40:32	14240	0
2019-08-09	05:50:32	14250	0
2019-08-09	06:00:32	14260	0
2019-08-09	06:10:32	14270	0
2019-08-09	06:20:32	14280	0
2019-08-09	06:30:32	14290	0
2019-08-09	06:40:32	14300	0.42
2019-08-09	06:50:32	14310	1.26
2019-08-09	07:00:32	14320	2.28
2019-08-09	07:10:32	14330	3.9
2019-08-09	07:20:32	14340	2.82
2019-08-09	07:30:32	14350	1.2
2019-08-09	07:40:32	14360	1.38
2019-08-09	07:50:32	14370	2.46
2019-08-09	08:00:32	14380	2.34
2019-08-09	08:10:32	14390	2.04
2019-08-09	08:20:32	14400	2.46
2019-08-09	08:30:32	14410	4.2
2019-08-09	08:40:32	14420	4.8
2019-08-09	08:50:32	14430	2.4
2019-08-09	09:00:32	14440	3.36
2019-08-09	09:10:32	14450	5.88
2019-08-09	09:20:32	14460	7.02
2019-08-09	09:30:32	14470	6.9
2019-08-09	09:40:32	14480	4.62
2019-08-09	09:50:32	14490	4.32
2019-08-09	10:00:32	14500	8.88
2019-08-09	10:10:32	14510	10.44
2019-08-09	10:20:32	14520	10.56
2019-08-09	10:30:32	14530	9.48
2019-08-09	10:40:32	14540	12.36
2019-08-09	10:50:32	14550	13.56
2019-08-09	11:00:32	14560	12.72
2019-08-09	11:10:32	14570	6
2019-08-09	11:20:32	14580	13.5
2019-08-09	11:30:32	14590	12
2019-08-09	11:40:32	14600	3
2019-08-09	11:50:32	14610	3.84
2019-08-09	12:00:32	14620	5.04
2019-08-09	12:10:32	14630	5.34
2019-08-09	12:20:32	14640	5.28
2019-08-09	12:30:32	14650	6.12
2019-08-09	12:40:32	14660	7.86
2019-08-09	12:50:32	14670	9.18
2019-08-09	13:00:32	14680	9.12
2019-08-09	13:10:32	14690	10.68
2019-08-09	13:20:32	14700	10.86
2019-08-09	13:30:32	14710	11.52
2019-08-09	13:40:32	14720	12.42
2019-08-09	13:50:32	14730	9.24
2019-08-09	14:00:32	14740	8.58
2019-08-09	14:10:32	14750	6.84
2019-08-09	14:20:32	14760	6.42
2019-08-09	14:30:32	14770	7.8
2019-08-09	14:40:32	14780	12
2019-08-09	14:50:32	14790	12.72
2019-08-09	15:00:32	14800	13.02
2019-08-09	15:10:32	14810	13.68
2019-08-09	15:20:32	14820	14.28
2019-08-09	15:30:32	14830	17.04
2019-08-09	15:40:32	14840	20.04
2019-08-09	15:50:32	14850	25.32
2019-08-09	16:00:32	14860	25.08
2019-08-09	16:10:32	14870	22.92
2019-08-09	16:20:32	14880	21.66
2019-08-09	16:30:32	14890	20.1
2019-08-09	16:40:32	14900	18
2019-08-09	16:50:32	14910	16.32
2019-08-09	17:00:32	14920	15.12
2019-08-09	17:10:32	14930	13.92
2019-08-09	17:20:32	14940	12.78
2019-08-09	17:30:32	14950	10.44
2019-08-09	17:40:32	14960	7.68
2019-08-09	17:50:32	14970	5.04
2019-08-09	18:00:32	14980	3.9
2019-08-09	18:10:32	14990	2.46
2019-08-09	18:20:32	15000	2.04
2019-08-09	18:30:32	15010	1.08
2019-08-09	18:40:32	15020	0.78
2019-08-09	18:50:32	15030	0.54
2019-08-09	19:00:32	15040	0.3
2019-08-09	19:10:32	15050	0.06
2019-08-09	19:20:32	15060	0
2019-08-09	19:30:32	15070	0
2019-08-09	19:40:32	15080	0
2019-08-09	19:50:32	15090	0
2019-08-09	20:00:32	15100	0
2019-08-09	20:10:32	15110	0
2019-08-09	20:20:32	15120	0
2019-08-09	20:30:32	15130	0
2019-08-09	20:40:32	15140	0
2019-08-09	20:50:32	15150	0
2019-08-09	21:00:32	15160	0
2019-08-09	21:10:32	15170	0
2019-08-09	21:20:32	15180	0
2019-08-09	21:30:32	15190	0
2019-08-09	21:40:32	15200	0
2019-08-09	21:50:32	15210	0
2019-08-09	22:00:32	15220	0
2019-08-09	22:10:32	15230	0
2019-08-09	22:20:32	15240	0
2019-08-09	22:30:32	15250	0
2019-08-09	22:40:32	15260	0
2019-08-09	22:50:32	15270	0
2019-08-09	23:00:32	15280	0
2019-08-09	23:10:32	15290	0
2019-08-09	23:20:32	15300	0
2019-08-09	23:30:32	15310	0
2019-08-09	23:40:32	15320	0
2019-08-09	23:50:32	15330	0
2019-08-10	00:00:32	15340	0
2019-08-10	00:10:32	15350	0
2019-08-10	00:20:32	15360	0
2019-08-10	00:30:32	15370	0
2019-08-10	00:40:32	15380	0
2019-08-10	00:50:32	15390	0
2019-08-10	01:00:32	15400	0
2019-08-10	01:10:32	15410	0
2019-08-10	01:20:32	15420	0
2019-08-10	01:30:32	15430	0
2019-08-10	01:40:32	15440	0
2019-08-10	01:50:32	15450	0
2019-08-10	02:00:32	15460	0
2019-08-10	02:10:32	15470	0
2019-08-10	02:20:32	15480	0
2019-08-10	02:30:32	15490	0
2019-08-10	02:40:32	15500	0
2019-08-10	02:50:32	15510	0
2019-08-10	03:00:32	15520	0
2019-08-10	03:10:32	15530	0
2019-08-10	03:20:32	15540	0
2019-08-10	03:30:32	15550	0
2019-08-10	03:40:32	15560	0
2019-08-10	03:50:32	15570	0
2019-08-10	04:00:32	15580	0
2019-08-10	04:10:32	15590	0
2019-08-10	04:20:32	15600	0
2019-08-10	04:30:32	15610	0
2019-08-10	04:40:32	15620	0
2019-08-10	04:50:32	15630	0
2019-08-10	05:00:32	15640	0
2019-08-10	05:10:32	15650	0
2019-08-10	05:20:32	15660	0
2019-08-10	05:30:32	15670	0
2019-08-10	05:40:32	15680	0
2019-08-10	05:50:32	15690	0
2019-08-10	06:00:32	15700	0
2019-08-10	06:10:32	15710	0
2019-08-10	06:20:32	15720	0
2019-08-10	06:30:32	15730	0
2019-08-10	06:40:32	15740	0
2019-08-10	06:50:32	15750	0.36
2019-08-10	07:00:32	15760	0.6
2019-08-10	07:10:32	15770	1.8
2019-08-10	07:20:32	15780	2.16
2019-08-10	07:30:32	15790	3
2019-08-10	07:40:32	15800	3.54
2019-08-10	07:50:32	15810	3.78
2019-08-10	08:00:32	15820	4.26
2019-08-10	08:10:32	15830	5.82
2019-08-10	08:20:32	15840	6.66
2019-08-10	08:30:32	15850	6.72
2019-08-10	08:40:32	15860	5.52
2019-08-10	08:50:32	15870	6.36
2019-08-10	09:00:32	15880	7.56
2019-08-10	09:10:32	15890	7.32
2019-08-10	09:20:32	15900	8.28
2019-08-10	09:30:32	15910	7.62
2019-08-10	09:40:32	15920	10.2
2019-08-10	09:50:32	15930	9.72
2019-08-10	10:00:32	15940	8.76
2019-08-10	10:10:32	15950	9.66
2019-08-10	10:20:32	15960	10.2
2019-08-10	10:30:32	15970	11.46
2019-08-10	10:40:32	15980	13.26
2019-08-10	10:50:32	15990	16.68
2019-08-10	11:00:32	16000	15.42
2019-08-10	11:10:32	16010	22.62
2019-08-10	11:20:32	16020	18.18
2019-08-10	11:30:32	16030	21.96
2019-08-10	11:40:32	16040	9.6
2019-08-10	11:50:32	16050	8.7
2019-08-10	12:00:32	16060	8.7
2019-08-10	12:10:32	16070	9.06
2019-08-10	12:20:32	16080	8.94
2019-08-10	12:30:32	16090	9.72
2019-08-10	12:40:32	16100	16.26
2019-08-10	12:50:32	16110	13.14
2019-08-10	13:00:32	16120	13.14
2019-08-10	13:10:32	16130	12.36
2019-08-10	13:20:32	16140	9.9
2019-08-10	13:30:32	16150	10.44
2019-08-10	13:40:32	16160	11.46
2019-08-10	13:50:32	16170	10.56
2019-08-10	14:00:32	16180	9
2019-08-10	14:10:32	16190	9.9
2019-08-10	14:20:32	16200	11.1
2019-08-10	14:30:32	16210	13.8
2019-08-10	14:40:32	16220	20.16
2019-08-10	14:50:32	16230	19.26
2019-08-10	15:00:32	16240	22.8
2019-08-10	15:10:32	16250	13.14
2019-08-10	15:20:32	16260	14.46
2019-08-10	15:30:32	16270	18.06
2019-08-10	15:40:32	16280	18.54
2019-08-10	15:50:32	16290	12.12
2019-08-10	16:00:32	16300	7.02
2019-08-10	16:10:32	16310	6.78
2019-08-10	16:20:32	16320	7.02
2019-08-10	16:30:32	16330	7.62
2019-08-10	16:40:32	16340	9.18
2019-08-10	16:50:32	16350	6.9
2019-08-10	17:00:32	16360	4.68
2019-08-10	17:10:32	16370	4.86
2019-08-10	17:20:32	16380	7.8
2019-08-10	17:30:32	16390	8.76
2019-08-10	17:40:32	16400	7.44
2019-08-10	17:50:32	16410	6.96
2019-08-10	18:00:32	16420	5.1
2019-08-10	18:10:32	16430	4.14
2019-08-10	18:20:32	16440	3.24
2019-08-10	18:30:32	16450	2.64
2019-08-10	18:40:32	16460	2.04
2019-08-10	18:50:32	16470	0.72
2019-08-10	19:00:32	16480	0.24
2019-08-10	19:10:32	16490	0.06
2019-08-10	19:20:32	16500	0
2019-08-10	19:30:32	16510	0
2019-08-10	19:40:32	16520	0
2019-08-10	19:50:32	16530	0
2019-08-10	20:00:32	16540	0
2019-08-10	20:10:32	16550	0
2019-08-10	20:20:32	16560	0
2019-08-10	20:30:32	16570	0
2019-08-10	20:40:32	16580	0
2019-08-10	20:50:32	16590	0
2019-08-10	21:00:32	16600	0
2019-08-10	21:10:32	16610	0
2019-08-10	21:20:32	16620	0
2019-08-10	21:30:32	16630	0
2019-08-10	21:40:32	16640	0
2019-08-10	21:50:32	16650	0
2019-08-10	22:00:32	16660	0
2019-08-10	22:10:32	16670	0
2019-08-10	22:20:32	16680	0
2019-08-10	22:30:32	16690	0
2019-08-10	22:40:32	16700	0
2019-08-10	22:50:32	16710	0
2019-08-10	23:00:32	16720	0
2019-08-10	23:10:32	16730	0
2019-08-10	23:20:32	16740	0
2019-08-10	23:30:32	16750	0
2019-08-10	23:40:32	16760	0
2019-08-10	23:50:32	16770	0
2019-08-11	00:00:32	16780	0
2019-08-11	00:10:32	16790	0
2019-08-11	00:20:32	16800	0
2019-08-11	00:30:32	16810	0
2019-08-11	00:40:32	16820	0
2019-08-11	00:50:32	16830	0
2019-08-11	01:00:32	16840	0
2019-08-11	01:10:32	16850	0
2019-08-11	01:20:32	16860	0
2019-08-11	01:30:32	16870	0
2019-08-11	01:40:32	16880	0
2019-08-11	01:50:32	16890	0
2019-08-11	02:00:32	16900	0
2019-08-11	02:10:32	16910	0
2019-08-11	02:20:32	16920	0
2019-08-11	02:30:32	16930	0
2019-08-11	02:40:32	16940	0
2019-08-11	02:50:32	16950	0
2019-08-11	03:00:32	16960	0
2019-08-11	03:10:32	16970	0
2019-08-11	03:20:32	16980	0
2019-08-11	03:30:32	16990	0
2019-08-11	03:40:32	17000	0
2019-08-11	03:50:32	17010	0
2019-08-11	04:00:32	17020	0
2019-08-11	04:10:32	17030	0
2019-08-11	04:20:32	17040	0
2019-08-11	04:30:32	17050	0
2019-08-11	04:40:32	17060	0
2019-08-11	04:50:32	17070	0
2019-08-11	05:00:32	17080	0
2019-08-11	05:10:32	17090	0
2019-08-11	05:20:32	17100	0
2019-08-11	05:30:32	17110	0
2019-08-11	05:40:32	17120	0
2019-08-11	05:50:32	17130	0
2019-08-11	06:00:32	17140	0
2019-08-11	06:10:32	17150	0
2019-08-11	06:20:32	17160	0
2019-08-11	06:30:32	17170	0
2019-08-11	06:40:32	17180	0
2019-08-11	06:50:32	17190	0.12
2019-08-11	07:00:32	17200	0.24
2019-08-11	07:10:32	17210	0.72
2019-08-11	07:20:32	17220	2.46
2019-08-11	07:30:32	17230	2.82
2019-08-11	07:40:32	17240	1.14
2019-08-11	07:50:32	17250	2.28
2019-08-11	08:00:32	17260	4.38
2019-08-11	08:10:32	17270	5.4
2019-08-11	08:20:32	17280	4.8
2019-08-11	08:30:32	17290	4.5
2019-08-11	08:40:32	17300	2.52
2019-08-11	08:50:32	17310	6.84
2019-08-11	09:00:32	17320	5.1
2019-08-11	09:10:32	17330	6.48
2019-08-11	09:20:32	17340	7.38
2019-08-11	09:30:32	17350	7.74
2019-08-11	09:40:32	17360	8.04
2019-08-11	09:50:32	17370	8.1
2019-08-11	10:00:32	17380	8.34
2019-08-11	10:10:32	17390	8.58
2019-08-11	10:20:32	17400	9.6
2019-08-11	10:30:32	17410	10.08
2019-08-11	10:40:32	17420	12.54
2019-08-11	10:50:32	17430	15.3
2019-08-11	11:00:32	17440	13.26
2019-08-11	11:10:32	17450	19.8
2019-08-11	11:20:32	17460	16.92
2019-08-11	11:30:32	17470	20.1
2019-08-11	11:40:32	17480	9.24
2019-08-11	11:50:32	17490	8.58
2019-08-11	12:00:32	17500	8.76
2019-08-11	12:10:32	17510	8.04
2019-08-11	12:20:32	17520	7.08
2019-08-11	12:30:32	17530	8.4
2019-08-11	12:40:32	17540	10.68
2019-08-11	12:50:32	17550	10.92
2019-08-11	13:00:32	17560	10.62
2019-08-11	13:10:32	17570	10.32
2019-08-11	13:20:32	17580	8.94
2019-08-11	13:30:32	17590	9.18
2019-08-11	13:40:32	17600	6.84
2019-08-11	13:50:32	17610	0.66
2019-08-11	14:00:32	17620	0.66
2019-08-11	14:10:32	17630	0.72
2019-08-11	14:20:32	17640	0.78
2019-08-11	14:30:32	17650	0.78
2019-08-11	14:40:32	17660	0.96
2019-08-11	14:50:32	17670	1.02
2019-08-11	15:00:32	17680	1.08
2019-08-11	15:10:32	17690	1.02
2019-08-11	15:20:32	17700	0.36
2019-08-11	15:30:32	17710	0.9
2019-08-11	15:40:32	17720	1.02
2019-08-11	15:50:32	17730	1.14
2019-08-11	16:00:32	17740	1.02
2019-08-11	16:10:32	17750	1.2
2019-08-11	16:20:32	17760	1.5
2019-08-11	16:30:32	17770	1.14
2019-08-11	16:40:32	17780	1.08
2019-08-11	16:50:32	17790	1.02
2019-08-11	17:00:32	17800	0.9
2019-08-11	17:10:32	17810	0.78
2019-08-11	17:20:32	17820	0.72
2019-08-11	17:30:32	17830	0.54
2019-08-11	17:40:32	17840	0.54
2019-08-11	17:50:32	17850	0.36
2019-08-11	18:00:32	17860	0.36
2019-08-11	18:10:32	17870	0.24
2019-08-11	18:20:32	17880	0.18
2019-08-11	18:30:32	17890	0
2019-08-11	18:40:32	17900	0
2019-08-11	18:50:32	17910	0
2019-08-11	19:00:32	17920	0
2019-08-11	19:10:32	17930	0
2019-08-11	19:20:32	17940	0
2019-08-11	19:30:32	17950	0
2019-08-11	19:40:32	17960	0
2019-08-11	19:50:32	17970	0
2019-08-11	20:00:32	17980	0
2019-08-11	20:10:32	17990	0
2019-08-11	20:20:32	18000	0
2019-08-11	20:30:32	18010	0
2019-08-11	20:40:32	18020	0
2019-08-11	20:50:32	18030	0
2019-08-11	21:00:32	18040	0
2019-08-11	21:10:32	18050	0
2019-08-11	21:20:32	18060	0
2019-08-11	21:30:32	18070	0
2019-08-11	21:40:32	18080	0
2019-08-11	21:50:32	18090	0
2019-08-11	22:00:32	18100	0
2019-08-11	22:10:32	18110	0
2019-08-11	22:20:32	18120	0
2019-08-11	22:30:32	18130	0
2019-08-11	22:40:32	18140	0
2019-08-11	22:50:32	18150	0
2019-08-11	23:00:32	18160	0
2019-08-11	23:10:32	18170	0
2019-08-11	23:20:32	18180	0
2019-08-11	23:30:32	18190	0
2019-08-11	23:40:32	18200	0
2019-08-11	23:50:32	18210	0
2019-08-12	00:00:32	18220	0
2019-08-12	00:10:32	18230	0
2019-08-12	00:20:32	18240	0
2019-08-12	00:30:32	18250	0
2019-08-12	00:40:32	18260	0
2019-08-12	00:50:32	18270	0
2019-08-12	01:00:32	18280	0
2019-08-12	01:10:32	18290	0
2019-08-12	01:20:32	18300	0
2019-08-12	01:30:32	18310	0
2019-08-12	01:40:32	18320	0
2019-08-12	01:50:32	18330	0
2019-08-12	02:00:32	18340	0
2019-08-12	02:10:32	18350	0
2019-08-12	02:20:32	18360	0
2019-08-12	02:30:32	18370	0
2019-08-12	02:40:32	18380	0
2019-08-12	02:50:32	18390	0
2019-08-12	03:00:32	18400	0
2019-08-12	03:10:32	18410	0
2019-08-12	03:20:32	18420	0
2019-08-12	03:30:32	18430	0
2019-08-12	03:40:32	18440	0
2019-08-12	03:50:32	18450	0
2019-08-12	04:00:32	18460	0
2019-08-12	04:10:32	18470	0
2019-08-12	04:20:32	18480	0
2019-08-12	04:30:32	18490	0
2019-08-12	04:40:32	18500	0
2019-08-12	04:50:32	18510	0
2019-08-12	05:00:32	18520	0
2019-08-12	05:10:32	18530	0
2019-08-12	05:20:32	18540	0
2019-08-12	05:30:32	18550	0
2019-08-12	05:40:32	18560	0
2019-08-12	05:50:32	18570	0
2019-08-12	06:00:32	18580	0
2019-08-12	06:10:32	18590	0
2019-08-12	06:20:32	18600	0
2019-08-12	06:30:32	18610	0
2019-08-12	06:40:32	18620	0
2019-08-12	06:50:32	18630	0
2019-08-12	07:00:32	18640	0
2019-08-12	07:10:32	18650	0
2019-08-12	07:20:32	18660	0
2019-08-12	07:30:32	18670	0.12
2019-08-12	07:40:32	18680	0.18
2019-08-12	07:50:32	18690	0.18
2019-08-12	08:00:32	18700	0.48
2019-08-12	08:10:32	18710	0.48
2019-08-12	08:20:32	18720	0.48
2019-08-12	08:30:32	18730	0.42
2019-08-12	08:40:32	18740	0.42
2019-08-12	08:50:32	18750	0.48
2019-08-12	09:00:32	18760	0.6
2019-08-12	09:10:32	18770	0.3
2019-08-12	09:20:32	18780	0.42
2019-08-12	09:30:32	18790	0.3
2019-08-12	09:40:32	18800	0.12
2019-08-12	09:50:32	18810	0.3
2019-08-12	10:00:32	18820	0.48
2019-08-12	10:10:32	18830	0.84
2019-08-12	10:20:32	18840	1.02
2019-08-12	10:30:32	18850	1.02
2019-08-12	10:40:32	18860	0.9
2019-08-12	10:50:32	18870	0.78
2019-08-12	11:00:32	18880	0.78
2019-08-12	11:10:32	18890	0.66
2019-08-12	11:20:32	18900	0.6
2019-08-12	11:30:32	18910	0.6
2019-08-12	11:40:32	18920	0.54
2019-08-12	11:50:32	18930	0.54
2019-08-12	12:00:32	18940	0.54
2019-08-12	12:10:32	18950	0.48
2019-08-12	12:20:32	18960	0.54
2019-08-12	12:30:32	18970	0.48
2019-08-12	12:40:32	18980	0.54
2019-08-12	12:50:32	18990	0.6
2019-08-12	13:00:32	19000	0.54
2019-08-12	13:10:32	19010	0.54
2019-08-12	13:20:32	19020	0.6
2019-08-12	13:30:32	19030	0.54
2019-08-12	13:40:32	19040	0.72
2019-08-12	13:50:32	19050	0.6
2019-08-12	14:00:32	19060	0.66
2019-08-12	14:10:32	19070	0.66
2019-08-12	14:20:32	19080	0.78
2019-08-12	14:30:32	19090	0.6
2019-08-12	14:40:32	19100	0.78
2019-08-12	14:50:32	19110	0.54
2019-08-12	15:00:32	19120	0.9
2019-08-12	15:10:32	19130	1.08
2019-08-12	15:20:32	19140	1.02
2019-08-12	15:30:32	19150	1.14
2019-08-12	15:40:32	19160	1.2
2019-08-12	15:50:32	19170	1.14
2019-08-12	16:00:32	19180	1.08
2019-08-12	16:10:32	19190	1.02
2019-08-12	16:20:32	19200	1.14
2019-08-12	16:30:32	19210	1.14
2019-08-12	16:40:32	19220	1.32
2019-08-12	16:50:32	19230	1.5
2019-08-12	17:00:32	19240	1.14
2019-08-12	17:10:32	19250	0.72
2019-08-12	17:20:32	19260	0.18
2019-08-12	17:30:32	19270	0.42
2019-08-12	17:40:32	19280	1.02
2019-08-12	17:50:32	19290	0.84
2019-08-12	18:00:32	19300	0.3
2019-08-12	18:10:32	19310	0.54
2019-08-12	18:20:32	19320	0.42
2019-08-12	18:30:32	19330	0.24
2019-08-12	18:40:32	19340	0.06
2019-08-12	18:50:32	19350	0
2019-08-12	19:00:32	19360	0
2019-08-12	19:10:32	19370	0
2019-08-12	19:20:32	19380	0
2019-08-12	19:30:32	19390	0
2019-08-12	19:40:32	19400	0
2019-08-12	19:50:32	19410	0
2019-08-12	20:00:32	19420	0
2019-08-12	20:10:32	19430	0
2019-08-12	20:20:32	19440	0
2019-08-12	20:30:32	19450	0
2019-08-12	20:40:32	19460	0
2019-08-12	20:50:32	19470	0
2019-08-12	21:00:32	19480	0
2019-08-12	21:10:32	19490	0
2019-08-12	21:20:32	19500	0
2019-08-12	21:30:32	19510	0
2019-08-12	21:40:32	19520	0
2019-08-12	21:50:32	19530	0
2019-08-12	22:00:32	19540	0
2019-08-12	22:10:32	19550	0
2019-08-12	22:20:32	19560	0
2019-08-12	22:30:32	19570	0
2019-08-12	22:40:32	19580	0
2019-08-12	22:50:32	19590	0
2019-08-12	23:00:32	19600	0
2019-08-12	23:10:32	19610	0
2019-08-12	23:20:32	19620	0
2019-08-12	23:30:32	19630	0
2019-08-12	23:40:32	19640	0
2019-08-12	23:50:32	19650	0
2019-08-13	00:00:32	19660	0
2019-08-13	00:10:32	19670	0
2019-08-13	00:20:32	19680	0
2019-08-13	00:30:32	19690	0
2019-08-13	00:40:32	19700	0
2019-08-13	00:50:32	19710	0
2019-08-13	01:00:32	19720	0
2019-08-13	01:10:32	19730	0
2019-08-13	01:20:32	19740	0
2019-08-13	01:30:32	19750	0
2019-08-13	01:40:32	19760	0
2019-08-13	01:50:32	19770	0
2019-08-13	02:00:32	19780	0
2019-08-13	02:10:32	19790	0
2019-08-13	02:20:32	19800	0
2019-08-13	02:30:32	19810	0
2019-08-13	02:40:32	19820	0
2019-08-13	02:50:32	19830	0
2019-08-13	03:00:32	19840	0
2019-08-13	03:10:32	19850	0
2019-08-13	03:20:32	19860	0
2019-08-13	03:30:32	19870	0
2019-08-13	03:40:32	19880	0
2019-08-13	03:50:32	19890	0
2019-08-13	04:00:32	19900	0
2019-08-13	04:10:32	19910	0
2019-08-13	04:20:32	19920	0
2019-08-13	04:30:32	19930	0
2019-08-13	04:40:32	19940	0
2019-08-13	04:50:32	19950	0
2019-08-13	05:00:32	19960	0
2019-08-13	05:10:32	19970	0
2019-08-13	05:20:32	19980	0
[truncated: 2,202 more rows]
