# Supplementary material for: A low-cost benthic incubation chamber for in-situ community metabolism measurements
Source: PeerJ. 2022 Apr 5;10:e13116. doi: 10.7717/peerj.13116 (PMC8992662; doi:10.7717/peerj.13116)
Supplement: Supplemental Information 6 — Change in salinity inside vs. outside the chambers to test for leakage [file peerj-10-13116-s006.xlsx]

## Sheet: Salinity
		Salinities inside vs. outside (ppt)
Minutes	Hours	Inside 1 (ppt)	Inside 2	Inside 3	Outside
1	0.0166667	39.2549	37.4125	35.3366	26.7944
2	0.0333333	39.2457	37.421	35.4066	26.7838
3	0.05	39.2457	37.4125	35.4208	26.7732
4	0.0666667	39.2642	37.4125	35.4542	26.7626
5	0.0833333	39.2549	37.421	35.4709	26.7521
6	0.1	39.2826	37.4125	35.4911	26.7415
7	0.116667	39.3011	37.4125	35.5246	26.7309
8	0.133333	39.2918	37.4125	35.4731	26.7203
9	0.15	39.2918	37.4125	35.4831	26.7097
10	0.166667	39.2826	37.4125	35.4731	26.6992
11	0.183333	39.2918	37.4125	35.4764	26.6886
12	0.2	39.2826	37.404	35.4395	26.678
13	0.216667	39.2826	37.4125	35.4329	26.6674
14	0.233333	39.2918	37.4125	35.4329	26.6568
15	0.25	39.2826	37.4125	35.4463	26.6463
16	0.266667	39.2826	37.0955	35.4015	26.6357
17	0.283333	39.2826	37.1867	35.463	26.6251
18	0.3	39.2826	37.1546	35.4329	26.6145
19	0.316667	39.2826	37.2081	35.4316	26.604
20	0.333333	39.2642	37.1831	35.4249	26.5934
21	0.35	39.2826	37.2081	35.4015	26.5828
22	0.366667	39.2826	37.2153	35.3781	26.5722
23	0.383333	39.2826	37.2582	35.3614	26.5616
24	0.4	39.2642	37.2068	35.3614	26.5511
25	0.416667	39.2642	37.1747	35.3768	26.5405
26	0.433333	39.2642	37.2318	35.3936	26.5299
27	0.45	39.2642	37.2081	35.3535	26.5193
28	0.466667	39.2642	37.1747	35.3535	26.5087
29	0.483333	39.2642	37.2081	35.3635	26.4982
30	0.5	39.2642	37.1997	35.3676	26.4876
31	0.516667	39.2642	37.1997	35.3476	26.477
32	0.533333	39.2642	37.1925	35.3402	26.4664
33	0.55	39.2549	37.1497	35.3543	26.4558
34	0.566667	39.2642	37.1854	35.3176	26.4453
35	0.583333	39.2642	37.1997	35.3176	26.4347
36	0.6	39.2549	37.1355	35.3176	26.4241
37	0.616667	39.2549	37.1854	35.3176	26.4135
38	0.633333	39.2642	37.1497	35.3243	26.403
39	0.65	39.2549	37.1605	35.2765	26.3924
40	0.666667	39.2549	37.1497	35.3018	26.3818
41	0.683333	39.2549	37.1605	35.3164	26.3712
42	0.7	39.2549	37.1605	35.2864	26.3606
43	0.716667	39.2549	37.1436	35.2864	26.3501
44	0.733333	39.2549	37.1329	35.2552	26.3395
45	0.75	39.2549	37.1436	35.2765	26.3289
46	0.766667	39.2549	37.0653	35.2552	26.3183
47	0.783333	39.2549	37.1008	35.2885	26.3077
48	0.8	39.2549	37.0831	35.2552	26.2972
49	0.816667	39.2549	37.0759	35.2253	26.2866
50	0.833333	39.2549	37.0902	35.3084	26.276
51	0.85	39.2549	37.1008	35.2486	26.2654
52	0.866667	39.2549	37.1329	35.2473	26.2548
53	0.883333	39.2549	37.0759	35.2473	26.2443
54	0.9	39.2457	37.0759	35.2473	26.2337
55	0.916667	39.2549	37.0759	35.2274	26.2231
56	0.933333	39.2549	37.0759	35.2573	26.2125
57	0.95	39.2457	37.0511	35.2274	26.202
58	0.966667	39.2549	37.0072	35.2473	26.1914
59	0.983333	39.2457	37.0653	35.2473	26.1808
60	1	39.2457	37.0072	35.2174	26.1702
61	1.01667	39.2457	37.0001	35.2042	26.1596
62	1.03333	39.2457	37.0156	35.2315	26.1491
63	1.05	39.2457	37.0249	35.2116	26.1385
64	1.06667	39.2457	37.032	35.2116	26.1279
65	1.08333	39.2457	37.0427	35.1685	26.1173
66	1.1	39.2365	37.0249	35.1718	26.1067
67	1.11667	39.2365	37.0427	35.1884	26.0962
68	1.13333	39.2365	36.986	35.2315	26.0856
69	1.15	39.2457	37.0249	35.2016	26.075
70	1.16667	39.2457	36.9988	35.1585	26.0644
71	1.18333	39.2457	37.032	35.1606	26.0538
72	1.2	39.2457	36.9669	35.1507	26.0433
73	1.21667	39.2365	37.0001	35.1408	26.0327
74	1.23333	39.2365	36.94	35.1507	26.0221
75	1.25	39.2457	36.9669	35.1805	26.0115
76	1.26667	39.2365	36.9669	35.1606	26.0009
77	1.28333	39.2365	36.9811	35.1308	25.9904
78	1.3	39.2365	36.9563	35.1606	25.9798
79	1.31667	39.2365	36.9479	35.1077	25.9692
80	1.33333	39.2365	36.9585	35.1329	25.9586
81	1.35	39.2365	36.9563	35.1428	25.9481
82	1.36667	39.2181	36.9316	35.123	25.9375
83	1.38333	39.2365	36.9479	35.1097	25.9269
84	1.4	39.2365	36.9409	35.1428	25.9163
85	1.41667	39.2365	36.9232	35.123	25.9057
86	1.43333	39.2365	36.9091	35.123	25.8952
87	1.45	39.2365	36.9232	35.1746	25.8846
88	1.46667	39.2365	36.8915	35.0998	25.874
89	1.48333	39.2365	36.8915	35.1527	25.8634
90	1.5	39.2365	36.8915	35.1019	25.8528
91	1.51667	39.2181	36.8915	35.1151	25.8423
92	1.53333	39.2181	36.9232	35.092	25.8317
93	1.55	39.2365	36.902	35.0722	25.8211
94	1.56667	39.2181	36.8747	35.0623	25.8105
95	1.58333	39.1803	36.8597	35.0722	25.7999
96	1.6	39.2105	36.85	35.0821	25.7894
97	1.61667	39.1615	36.8606	35.1059	25.7788
98	1.63333	39.2181	36.85	35.0994	25.7682
99	1.65	39.2105	36.843	35.0861	25.7576
100	1.66667	39.2105	36.8852	35.0565	25.7471
101	1.68333	39.1502	36.8254	35.0763	25.7365
102	1.7	39.1389	36.8184	35.0664	25.7259
103	1.71667	39.1577	36.7938	35.0763	25.7153
104	1.73333	39.1573	36.8184	35.0763	25.7047
105	1.75	39.1389	36.8276	35.063	25.6942
106	1.76667	39.1577	36.817	35.0684	25.6836
107	1.78333	39.1109	36.81	35.0552	25.673
108	1.8	39.0996	36.7854	35.0334	25.6624
109	1.81667	39.1502	36.7994	35.0848	25.6518
110	1.83333	39.1577	36.81	35.0783	25.6413
111	1.85	39.1502	36.7854	35.0783	25.6307
112	1.86667	39.1486	36.8417	35.0552	25.6201
113	1.88333	39.0807	36.7994	35.0552	25.6095
114	1.9	39.0899	36.7854	35.0354	25.5989
115	1.91667	39.0786	36.7748	35.077	25.5884
116	1.93333	39.0507	36.7959	35.0552	25.5778
117	1.95	39.0975	36.7854	35.0572	25.5672
118	1.96667	39.0996	36.81	35.0276	25.5566
119	1.98333	39.0394	36.7748	35.0704	25.546
120	2	39.0373	36.7771	34.9979	25.5355
121	2.01667	39.0582	36.7279	35.0276	25.5249
122	2.03333	39.0674	36.763	35.0473	25.5143
123	2.05	39.0282	36.7525	34.9979	25.5037
124	2.06667	39.0695	36.7771	35.0704	25.4932
125	2.08333	39.0282	36.7525	35.002	25.4826
126	2.1	39.0394	36.7209	34.9889	25.472
127	2.11667	39.0394	36.7595	35.0251	25.4614
128	2.13333	39.0582	36.7454	35.0119	25.4508
129	2.15	39.0094	36.7104	35.0119	25.4403
130	2.16667	38.9682	36.7371	34.9822	25.4297
131	2.18333	39.0094	36.7126	35.0283	25.4191
132	2.2	38.9794	36.7126	35.002	25.4085
133	2.21667	38.9982	36.7021	35.002	25.3979
134	2.23333	38.9982	36.6636	34.9691	25.3874
135	2.25	38.9794	36.7195	34.9592	25.3768
136	2.26667	39.0169	36.6854	34.981	25.3662
137	2.28333	38.9682	36.7126	34.9416	25.3556
138	2.3	38.9869	36.6881	34.9678	25.345
139	2.31667	38.9869	36.6959	34.9514	25.3345
140	2.33333	38.9869	36.6819	34.9219	25.3239
141	2.35	38.9869	36.6714	34.9908	25.3133
142	2.36667	38.9869	36.6609	34.981	25.3027
143	2.38333	38.957	36.7195	34.9613	25.2922
144	2.4	38.957	36.6959	34.9514	25.2816
145	2.41667	38.957	36.6469	34.9613	25.271
146	2.43333	38.9495	36.6399	34.981	25.2604
147	2.45	38.957	36.6714	34.9317	25.2498
148	2.46667	38.927	36.6155	34.9383	25.2393
149	2.48333	38.9682	36.6469	34.9534	25.2287
150	2.5	38.9682	36.6469	34.8911	25.2181
151	2.51667	38.9682	36.6225	34.9436	25.2075
152	2.53333	38.9084	36.6155	34.901	25.1969
153	2.55	38.8972	36.6316	34.9534	25.1864
154	2.56667	38.9084	36.6072	34.96	25.1758
155	2.58333	38.9084	36.6316	34.9108	25.1652
156	2.6	38.9703	36.6141	34.9305	25.1546
157	2.61667	38.9084	36.5828	34.9108	25.144
158	2.63333	38.9383	36.5828	34.9305	25.1335
159	2.65	38.9383	36.5515	34.8911	25.1229
160	2.66667	38.8988	36.6141	34.9325	25.1123
161	2.68333	38.9196	36.5723	34.901	25.1017
162	2.7	38.9196	36.6058	34.9403	25.0912
163	2.71667	38.9084	36.5745	34.9108	25.0806
164	2.73333	38.8599	36.5605	34.8813	25.07
165	2.75	38.8599	36.5849	34.8813	25.0594
166	2.76667	38.8972	36.5989	34.8813	25.0488
167	2.78333	38.927	36.5745	34.9108	25.0383
168	2.8	38.8972	36.5849	34.9161	25.0277
169	2.81667	38.8673	36.5745	34.8932	25.0171
170	2.83333	38.8599	36.5432	34.8735	25.0065
171	2.85	38.8876	36.5745	34.8636	24.9959
172	2.86667	38.8785	36.5501	34.8735	24.9854
173	2.88333	38.8876	36.4966	34.8899	24.9748
174	2.9	38.8673	36.5105	34.8735	24.9642
175	2.91667	38.8785	36.5418	34.8506	24.9536
176	2.93333	38.8375	36.5418	34.8801	24.943
177	2.95	38.8487	36.5105	34.8735	24.9325
178	2.96667	38.8562	36.5209	34.8506	24.9219
179	2.98333	38.8972	36.5209	34.8801	24.9113
180	3	38.8487	36.5105	34.8604	24.9007
181	3.01667	38.8785	36.5349	34.8735	24.8901
182	3.03333	38.8375	36.4723	34.831	24.8796
183	3.05	38.8189	36.5114	34.8114	24.869
184	3.06667	38.8562	36.5043	34.8343	24.8584
185	3.08333	38.8673	36.5043	34.8212	24.8478
186	3.1	38.7966	36.4696	34.8212	24.8373
187	3.11667	38.8673	36.4801	34.8179	24.8267
188	3.13333	38.7966	36.4801	34.8506	24.8161
189	3.15	38.8077	36.487	34.8604	24.8055
190	3.16667	38.8487	36.4801	34.8506	24.7949
191	3.18333	38.8057	36.4454	34.8081	24.7844
192	3.2	38.8077	36.4245	34.8506	24.7738
193	3.21667	38.8168	36.4454	34.8114	24.7632
194	3.23333	38.8077	36.4718	34.831	24.7526
195	3.25	38.7892	36.451	34.831	24.742
196	3.26667	38.8562	36.4696	34.831	24.7315
197	3.28333	38.7966	36.4718	34.831	24.7209
198	3.3	38.778	36.4718	34.831	24.7103
199	3.31667	38.7892	36.4302	34.8212	24.6997
200	3.33333	38.7668	36.4371	34.8212	24.6891
201	3.35	38.7966	36.4371	34.8506	24.6786
202	3.36667	38.7594	36.4059	34.7983	24.668
203	3.38333	38.7759	36.4718	34.7918	24.6574
204	3.4	38.7668	36.4718	34.7918	24.6468
205	3.41667	38.8077	36.3817	34.7983	24.6363
206	3.43333	38.7871	36.4392	34.7788	24.6257
207	3.45	38.7371	36.4163	34.769	24.6151
208	3.46667	38.7871	36.408	34.7983	24.6045
209	3.48333	38.8189	36.3838	34.7788	24.5939
210	3.5	38.778	36.4392	34.7494	24.5834
211	3.51667	38.8264	36.3527	34.7592	24.5728
212	3.53333	38.7574	36.408	34.7494	24.5622
213	3.55	38.7594	36.3942	34.7983	24.5516
214	3.56667	38.7685	36.3838	34.7865	24.541
215	3.58333	38.7685	36.4067	34.7494	24.5305
216	3.6	38.7685	36.3838	34.7702	24.5199
217	3.61667	38.7092	36.3859	34.7279	24.5093
218	3.63333	38.7297	36.3859	34.7963	24.4987
219	3.65	38.7297	36.3514	34.7572	24.4881
220	3.66667	38.7388	36.3859	34.7768	24.4776
221	3.68333	38.7983	36.3756	34.7572	24.467
222	3.7	38.7277	36.3998	34.7865	24.4564
223	3.71667	38.7462	36.3756	34.7572	24.4458
224	3.73333	38.7462	36.3652	34.7768	24.4352
225	3.75	38.7574	36.3452	34.7572	24.4247
226	3.76667	38.7166	36.3203	34.7572	24.4141
227	3.78333	38.7668	36.3445	34.7279	24.4035
228	3.8	38.7483	36.3756	34.7279	24.3929
229	3.81667	38.7388	36.3617	34.7572	24.3824
230	3.83333	38.689	36.328	34.7279	24.3718
231	3.85	38.7092	36.3349	34.7051	24.3612
232	3.86667	38.7277	36.3452	34.7064	24.3506
233	3.88333	38.7075	36.3452	34.7259	24.34
234	3.9	38.7462	36.3141	34.6966	24.3295
235	3.91667	38.7166	36.3211	34.765	24.3189
236	3.93333	38.7092	36.3211	34.7064	24.3083
237	3.95	38.7388	36.3267	34.7259	24.2977
238	3.96667	38.7483	36.3038	34.7552	24.2871
239	3.98333	38.6684	36.3267	34.7129	24.2766
240	4	38.7277	36.29	34.6739	24.266
	mean	39.0441	36.7876	35.0462	24.2554
	stdev	0.202781	0.314107	0.220083	24.2448
					24.2342
