# Supplementary material for: A low-cost benthic incubation chamber for in-situ community metabolism measurements
Source: PeerJ. 2022 Apr 5;10:e13116. doi: 10.7717/peerj.13116 (PMC8992662; doi:10.7717/peerj.13116)
Supplement: Supplemental Information 7 [file peerj-10-13116-s007.xlsx]

## Sheet: Seagrass.par
date	time	PAR (umol m/s)
2019-07-29	11:02:36	117
2019-07-29	11:03:36	105
2019-07-29	11:04:36	105
2019-07-29	11:05:36	105
2019-07-29	11:06:36	72
2019-07-29	11:07:36	66
2019-07-29	11:08:36	66
2019-07-29	11:09:36	94
2019-07-29	11:10:36	125
2019-07-29	11:11:36	125
2019-07-29	11:12:36	124
2019-07-29	11:13:36	124
2019-07-29	11:14:36	124
2019-07-29	11:15:36	124
2019-07-29	11:16:36	125
2019-07-29	11:17:36	123
2019-07-29	11:18:36	553
2019-07-29	11:19:36	800
2019-07-29	11:20:36	383
2019-07-29	11:21:36	313
2019-07-29	11:22:36	298
2019-07-29	11:23:36	285
2019-07-29	11:24:36	281
2019-07-29	11:25:36	295
2019-07-29	11:26:36	292
2019-07-29	11:27:36	291
2019-07-29	11:28:36	542
2019-07-29	11:29:36	772
2019-07-29	11:30:36	49
2019-07-29	11:31:36	287
2019-07-29	11:32:36	369
2019-07-29	11:33:36	326
2019-07-29	11:34:36	232
2019-07-29	11:35:36	209
2019-07-29	11:36:36	201
2019-07-29	11:37:36	215
2019-07-29	11:38:36	263
2019-07-29	11:39:36	371
2019-07-29	11:40:36	325
2019-07-29	11:41:36	283
2019-07-29	11:42:36	262
2019-07-29	11:43:36	278
2019-07-29	11:44:36	203
2019-07-29	11:45:36	200
2019-07-29	11:46:36	212
2019-07-29	11:47:36	205
2019-07-29	11:48:36	187
2019-07-29	11:49:36	182
2019-07-29	11:50:36	184
2019-07-29	11:51:36	181
2019-07-29	11:52:36	175
2019-07-29	11:53:36	173
2019-07-29	11:54:36	172
2019-07-29	11:55:36	143
2019-07-29	11:56:36	169
2019-07-29	11:57:36	176
2019-07-29	11:58:36	174
2019-07-29	11:59:36	169
2019-07-29	12:00:36	166
2019-07-29	12:01:36	158
2019-07-29	12:02:36	136
2019-07-29	12:03:36	104
2019-07-29	12:04:36	89
2019-07-29	12:05:36	80
2019-07-29	12:06:36	77
2019-07-29	12:07:36	65
2019-07-29	12:08:36	77
2019-07-29	12:09:36	83
2019-07-29	12:10:36	99
2019-07-29	12:11:36	117
2019-07-29	12:12:36	137
2019-07-29	12:13:36	142
2019-07-29	12:14:36	142
2019-07-29	12:15:36	140
2019-07-29	12:16:36	139
2019-07-29	12:17:36	139
2019-07-29	12:18:36	138
2019-07-29	12:19:36	136
2019-07-29	12:20:36	135
2019-07-29	12:21:36	134
2019-07-29	12:22:36	131
2019-07-29	12:23:36	130
2019-07-29	12:24:36	127
2019-07-29	12:25:36	126
2019-07-29	12:26:36	124
2019-07-29	12:27:36	123
2019-07-29	12:28:36	122
2019-07-29	12:29:36	121
2019-07-29	12:30:36	122
2019-07-29	12:31:36	122
2019-07-29	12:32:36	121
2019-07-29	12:33:36	121
2019-07-29	12:34:36	130
2019-07-29	12:35:36	130
2019-07-29	12:36:36	131
2019-07-29	12:37:36	131
2019-07-29	12:38:36	131
2019-07-29	12:39:36	131
2019-07-29	12:40:36	132
2019-07-29	12:41:36	131
2019-07-29	12:42:36	132
2019-07-29	12:43:36	132
2019-07-29	12:44:36	132
2019-07-29	12:45:36	132
2019-07-29	12:46:36	133
2019-07-29	12:47:36	133
2019-07-29	12:48:36	133
2019-07-29	12:49:36	132
2019-07-29	12:50:36	133
2019-07-29	12:51:36	134
2019-07-29	12:52:36	132
2019-07-29	12:53:36	136
2019-07-29	12:54:36	138
2019-07-29	12:55:36	141
2019-07-29	12:56:36	144
2019-07-29	12:57:36	148
2019-07-29	12:58:36	152
2019-07-29	12:59:36	155
2019-07-29	13:00:36	159
2019-07-29	13:01:36	161
2019-07-29	13:02:36	165
2019-07-29	13:03:36	168
2019-07-29	13:04:36	172
2019-07-29	13:05:36	175
2019-07-29	13:06:36	179
2019-07-29	13:07:36	182
2019-07-29	13:08:36	186
2019-07-29	13:09:36	190
2019-07-29	13:10:36	193
2019-07-29	13:11:36	198
2019-07-29	13:12:36	202
2019-07-29	13:13:36	206
2019-07-29	13:14:36	211
2019-07-29	13:15:36	214
2019-07-29	13:16:36	220
2019-07-29	13:17:36	226
2019-07-29	13:18:36	230
2019-07-29	13:19:36	240
2019-07-29	13:20:36	246
2019-07-29	13:21:36	252
2019-07-29	13:22:36	258
2019-07-29	13:23:36	263
2019-07-29	13:24:36	269
2019-07-29	13:25:36	276
2019-07-29	13:26:36	286
2019-07-29	13:27:36	296
2019-07-29	13:28:36	314
2019-07-29	13:29:36	261
2019-07-29	13:30:36	50
2019-07-29	13:31:36	56
2019-07-29	13:32:36	68
2019-07-29	13:33:36	80
2019-07-29	13:34:36	88
2019-07-29	13:35:36	89
2019-07-29	13:36:36	87
2019-07-29	13:37:36	82
2019-07-29	13:38:36	82
2019-07-29	13:39:36	88
2019-07-29	13:40:36	97
2019-07-29	13:41:36	97
2019-07-29	13:42:36	104
2019-07-29	13:43:36	115
2019-07-29	13:44:36	124
2019-07-29	13:45:36	245
2019-07-29	13:46:36	274
2019-07-29	13:47:36	257
2019-07-29	13:48:36	237
2019-07-29	13:49:36	227
2019-07-29	13:50:36	227
2019-07-29	13:51:36	235
2019-07-29	13:52:36	246
2019-07-29	13:53:36	281
2019-07-29	13:54:36	322
2019-07-29	13:55:36	351
2019-07-29	13:56:36	384
2019-07-29	13:57:36	403
2019-07-29	13:58:36	413
2019-07-29	13:59:36	419
2019-07-29	14:00:36	439
2019-07-29	14:01:36	453
2019-07-29	14:02:36	471
2019-07-29	14:03:36	478
2019-07-29	14:04:36	477
2019-07-29	14:05:36	291
2019-07-29	14:06:36	105
2019-07-29	14:07:36	62
2019-07-29	14:08:36	61
2019-07-29	14:09:36	73
2019-07-29	14:10:36	116
2019-07-29	14:11:36	282
2019-07-29	14:12:36	253
2019-07-29	14:13:36	460
2019-07-29	14:14:36	1172
2019-07-29	14:15:36	1162
2019-07-29	14:16:36	1061
2019-07-29	14:17:36	1115
2019-07-29	14:18:36	1108
2019-07-29	14:19:36	1072
2019-07-29	14:20:36	1058
2019-07-29	14:21:36	970
2019-07-29	14:22:36	834
2019-07-29	14:23:36	531
2019-07-29	14:24:36	424
2019-07-29	14:25:36	159
2019-07-29	14:26:36	839
2019-07-29	14:27:36	1037
2019-07-29	14:28:36	728
2019-07-29	14:29:36	342
2019-07-29	14:30:36	162
2019-07-29	14:31:36	427
2019-07-29	14:32:36	395
2019-07-29	14:33:36	379
2019-07-29	14:34:36	451
2019-07-29	14:35:36	388
2019-07-29	14:36:36	342
2019-07-29	14:37:36	246
2019-07-29	14:38:36	310
2019-07-29	14:39:36	349
2019-07-29	14:40:36	234
2019-07-29	14:41:36	214
2019-07-29	14:42:36	230
2019-07-29	14:43:36	209
2019-07-29	14:44:36	275
2019-07-29	14:45:36	224
2019-07-29	14:46:36	245
2019-07-29	14:47:36	262
2019-07-29	14:48:36	183
2019-07-29	14:49:36	192
2019-07-29	14:50:36	106
2019-07-29	14:51:36	116
2019-07-29	14:52:36	137
2019-07-29	14:53:36	143
2019-07-29	14:54:36	128
2019-07-29	14:55:36	143
2019-07-29	14:56:36	140
2019-07-29	14:57:36	178
2019-07-29	14:58:36	145
2019-07-29	14:59:36	176
2019-07-29	15:00:36	172
2019-07-29	15:01:36	167
2019-07-29	15:02:36	169
2019-07-29	15:03:36	225
2019-07-29	15:04:36	164
2019-07-29	15:05:36	271
2019-07-29	15:06:36	161
2019-07-29	15:07:36	342
2019-07-29	15:08:36	230
2019-07-29	15:09:36	177
2019-07-29	15:10:36	158
2019-07-29	15:11:36	149
2019-07-29	15:12:36	154
2019-07-29	15:13:36	149
2019-07-29	15:14:36	212
2019-07-29	15:15:36	300
2019-07-29	15:16:36	251
2019-07-29	15:17:36	184
2019-07-29	15:18:36	209
2019-07-29	15:19:36	162
2019-07-29	15:20:36	161
2019-07-29	15:21:36	178
2019-07-29	15:22:36	159
2019-07-29	15:23:36	178
2019-07-29	15:24:36	168
2019-07-29	15:25:36	169
2019-07-29	15:26:36	153
2019-07-29	15:27:36	190
2019-07-29	15:28:36	176
2019-07-29	15:29:36	196
2019-07-29	15:30:36	178
2019-07-29	15:31:36	170
2019-07-29	15:32:36	170
2019-07-29	15:33:36	153
2019-07-29	15:34:36	165
2019-07-29	15:35:36	349
2019-07-29	15:36:36	132
2019-07-29	15:37:36	161
2019-07-29	15:38:36	147
2019-07-29	15:39:36	151
2019-07-29	15:40:36	114
2019-07-29	15:41:36	182
2019-07-29	15:42:36	156
2019-07-29	15:43:36	188
2019-07-29	15:44:36	156
2019-07-29	15:45:36	155
2019-07-29	15:46:36	155
2019-07-29	15:47:36	163
2019-07-29	15:48:36	174
2019-07-29	15:49:36	161
2019-07-29	15:50:36	193
2019-07-29	15:51:36	108
2019-07-29	15:52:36	142
2019-07-29	15:53:36	104
2019-07-29	15:54:36	22
2019-07-29	15:55:36	20
2019-07-29	15:56:36	19
2019-07-29	15:57:36	19
2019-07-29	15:58:36	22
2019-07-29	15:59:36	35
2019-07-29	16:00:36	32
2019-07-29	16:01:36	23
2019-07-29	16:02:36	44
2019-07-29	16:03:36	47
2019-07-29	16:04:36	39
2019-07-29	16:05:36	31
2019-07-29	16:06:36	30
2019-07-29	16:07:36	27
2019-07-29	16:08:36	16
2019-07-29	16:09:36	21
2019-07-29	16:10:36	36
2019-07-29	16:11:36	25
2019-07-29	16:12:36	19
2019-07-29	16:13:36	19
2019-07-29	16:14:36	30
2019-07-29	16:15:36	18
2019-07-29	16:16:36	17
2019-07-29	16:17:36	18
2019-07-29	16:18:36	19
2019-07-29	16:19:36	32
2019-07-29	16:20:36	16
2019-07-29	16:21:36	16
2019-07-29	16:22:36	16
2019-07-29	16:23:36	15
2019-07-29	16:24:36	17
2019-07-29	16:25:36	21
2019-07-29	16:26:36	44
2019-07-29	16:27:36	46
2019-07-29	16:28:36	48
2019-07-29	16:29:36	47
2019-07-29	16:30:36	46
2019-07-29	16:31:36	47
2019-07-29	16:32:36	45
2019-07-29	16:33:36	45
2019-07-29	16:34:36	39
2019-07-29	16:35:36	9
2019-07-29	16:36:36	9
2019-07-29	16:37:36	9
2019-07-29	16:38:36	11
2019-07-29	16:39:36	10
2019-07-29	16:40:36	10
2019-07-29	16:41:36	10
2019-07-29	16:42:36	11
2019-07-29	16:43:36	10
2019-07-29	16:44:36	10
2019-07-29	16:45:36	10
2019-07-29	16:46:36	11
2019-07-29	16:47:36	10
2019-07-29	16:48:36	10
2019-07-29	16:49:36	10
2019-07-29	16:50:36	10
2019-07-29	16:51:36	11
2019-07-29	16:52:36	10
2019-07-29	16:53:36	11
2019-07-29	16:54:36	11
2019-07-29	16:55:36	10
2019-07-29	16:56:36	11
2019-07-29	16:57:36	10
2019-07-29	16:58:36	11
2019-07-29	16:59:36	11
2019-07-29	17:00:36	11
2019-07-29	17:01:36	11
2019-07-29	17:02:36	11
2019-07-29	17:03:36	11
2019-07-29	17:04:36	11
2019-07-29	17:05:36	11
2019-07-29	17:06:36	12
2019-07-29	17:07:36	11
2019-07-29	17:08:36	11
2019-07-29	17:09:36	11
2019-07-29	17:10:36	11
2019-07-29	17:11:36	11
2019-07-29	17:12:36	11
2019-07-29	17:13:36	11
2019-07-29	17:14:36	12
2019-07-29	17:15:36	10
2019-07-29	17:16:36	10
2019-07-29	17:17:36	10
2019-07-29	17:18:36	11
2019-07-29	17:19:36	8
2019-07-29	17:20:36	8
2019-07-29	17:21:36	57
2019-07-29	17:22:36	58
2019-07-29	17:23:36	39
2019-07-29	17:24:36	34
2019-07-29	17:25:36	33
2019-07-29	17:26:36	34
2019-07-29	17:27:36	32
2019-07-29	17:28:36	30
2019-07-29	17:29:36	32
2019-07-29	17:30:36	31
2019-07-29	17:31:36	30
2019-07-29	17:32:36	29
2019-07-29	17:33:36	30
2019-07-29	17:34:36	24
2019-07-29	17:35:36	23
2019-07-29	17:36:36	21
2019-07-29	17:37:36	21
2019-07-29	17:38:36	52
2019-07-29	17:39:36	39
2019-07-29	17:40:36	0
2019-07-29	17:41:36	0
2019-07-29	17:42:36	0
2019-07-29	17:43:36	0
2019-07-29	17:44:36	0
2019-07-29	17:45:36	0
2019-07-29	17:46:36	0
2019-07-29	17:47:36	0
2019-07-29	17:48:36	0
2019-07-29	17:49:36	0
2019-07-29	17:50:36	0
2019-07-29	17:51:36	0
2019-07-29	17:52:36	0
2019-07-29	17:53:36	0
2019-07-29	17:54:36	0
2019-07-29	17:55:36	0
2019-07-29	17:56:36	0
2019-07-29	17:57:36	0
2019-07-29	17:58:36	0
2019-07-29	17:59:36	0
2019-07-29	18:00:36	0
2019-07-29	18:01:36	0
2019-07-29	18:02:36	0
2019-07-29	18:03:36	0
2019-07-29	18:04:36	0
2019-07-29	18:05:36	0
2019-07-29	18:06:36	0
2019-07-29	18:07:36	0
2019-07-29	18:08:36	0
2019-07-29	18:09:36	0
2019-07-29	18:10:36	0
2019-07-29	18:11:36	0
2019-07-29	18:12:36	0
2019-07-29	18:13:36	0
2019-07-29	18:14:36	0
2019-07-29	18:15:36	0
2019-07-29	18:16:36	0
2019-07-29	18:17:36	0
2019-07-29	18:18:36	0
2019-07-29	18:19:36	0
2019-07-29	18:20:36	0
2019-07-29	18:21:36	0
2019-07-29	18:22:36	0
2019-07-29	18:23:36	0
2019-07-29	18:24:36	0
2019-07-29	18:25:36	0
2019-07-29	18:26:36	0
2019-07-29	18:27:36	0
2019-07-29	18:28:36	0
2019-07-29	18:29:36	0
2019-07-29	18:30:36	0
2019-07-29	18:31:36	0
2019-07-29	18:32:36	0
2019-07-29	18:33:36	0
2019-07-29	18:34:36	0
2019-07-29	18:35:36	0
2019-07-29	18:36:36	0
2019-07-29	18:37:36	0
2019-07-29	18:38:36	0
2019-07-29	18:39:36	0
2019-07-29	18:40:36	0
2019-07-29	18:41:36	0
2019-07-29	18:42:36	0
2019-07-29	18:43:36	0
2019-07-29	18:44:36	0
2019-07-29	18:45:36	0
2019-07-29	18:46:36	0
2019-07-29	18:47:36	0
2019-07-29	18:48:36	0
2019-07-29	18:49:36	0
2019-07-29	18:50:36	0
2019-07-29	18:51:36	0
2019-07-29	18:52:36	0
2019-07-29	18:53:36	0
2019-07-29	18:54:36	0
2019-07-29	18:55:36	0
2019-07-29	18:56:36	0
2019-07-29	18:57:36	0
2019-07-29	18:58:36	0
2019-07-29	18:59:36	0
2019-07-29	19:00:36	0
2019-07-29	19:01:36	0
2019-07-29	19:02:36	0
2019-07-29	19:03:36	0
2019-07-29	19:04:36	0
2019-07-29	19:05:36	0
2019-07-29	19:06:36	0
2019-07-29	19:07:36	0
2019-07-29	19:08:36	0
2019-07-29	19:09:36	0
2019-07-29	19:10:36	0
2019-07-29	19:11:36	0
2019-07-29	19:12:36	0
2019-07-29	19:13:36	0
2019-07-29	19:14:36	0
2019-07-29	19:15:36	0
2019-07-29	19:16:36	0
2019-07-29	19:17:36	0
2019-07-29	19:18:36	0
2019-07-29	19:19:36	0
2019-07-29	19:20:36	0
2019-07-29	19:21:36	0
2019-07-29	19:22:36	0
2019-07-29	19:23:36	0
2019-07-29	19:24:36	0
2019-07-29	19:25:36	0
2019-07-29	19:26:36	0
2019-07-29	19:27:36	0
2019-07-29	19:28:36	0
2019-07-29	19:29:36	0
2019-07-29	19:30:36	0
2019-07-29	19:31:36	0
2019-07-29	19:32:36	0
2019-07-29	19:33:36	0
2019-07-29	19:34:36	0
2019-07-29	19:35:36	0
2019-07-29	19:36:36	0
2019-07-29	19:37:36	0
2019-07-29	19:38:36	0
2019-07-29	19:39:36	0
2019-07-29	19:40:36	0
2019-07-29	19:41:36	0
2019-07-29	19:42:36	0
2019-07-29	19:43:36	0
2019-07-29	19:44:36	0
2019-07-29	19:45:36	0
2019-07-29	19:46:36	0
2019-07-29	19:47:36	0
2019-07-29	19:48:36	0
2019-07-29	19:49:36	0
2019-07-29	19:50:36	0
2019-07-29	19:51:36	0
2019-07-29	19:52:36	0
2019-07-29	19:53:36	0
2019-07-29	19:54:36	0
2019-07-29	19:55:36	0
2019-07-29	19:56:36	0
2019-07-29	19:57:36	0
2019-07-29	19:58:36	0
2019-07-29	19:59:36	0
2019-07-29	20:00:36	0
2019-07-29	20:01:36	0
2019-07-29	20:02:36	0
2019-07-29	20:03:36	0
2019-07-29	20:04:36	0
2019-07-29	20:05:36	0
2019-07-29	20:06:36	0
2019-07-29	20:07:36	0
2019-07-29	20:08:36	0
2019-07-29	20:09:36	0
2019-07-29	20:10:36	0
2019-07-29	20:11:36	0
2019-07-29	20:12:36	0
2019-07-29	20:13:36	0
2019-07-29	20:14:36	0
2019-07-29	20:15:36	0
2019-07-29	20:16:36	0
2019-07-29	20:17:36	0
2019-07-29	20:18:36	0
2019-07-29	20:19:36	0
2019-07-29	20:20:36	0
2019-07-29	20:21:36	0
2019-07-29	20:22:36	0
2019-07-29	20:23:36	0
2019-07-29	20:24:36	0
2019-07-29	20:25:36	0
2019-07-29	20:26:36	0
2019-07-29	20:27:36	0
2019-07-29	20:28:36	0
2019-07-29	20:29:36	0
2019-07-29	20:30:36	0
2019-07-29	20:31:36	0
2019-07-29	20:32:36	0
2019-07-29	20:33:36	0
2019-07-29	20:34:36	0
2019-07-29	20:35:36	0
2019-07-29	20:36:36	0
2019-07-29	20:37:36	0
2019-07-29	20:38:36	0
2019-07-29	20:39:36	0
2019-07-29	20:40:36	0
2019-07-29	20:41:36	0
2019-07-29	20:42:36	0
2019-07-29	20:43:36	0
2019-07-29	20:44:36	0
2019-07-29	20:45:36	0
2019-07-29	20:46:36	0
2019-07-29	20:47:36	0
2019-07-29	20:48:36	0
2019-07-29	20:49:36	0
2019-07-29	20:50:36	0
2019-07-29	20:51:36	0
2019-07-29	20:52:36	0
2019-07-29	20:53:36	0
2019-07-29	20:54:36	0
2019-07-29	20:55:36	0
2019-07-29	20:56:36	0
2019-07-29	20:57:36	0
2019-07-29	20:58:36	0
2019-07-29	20:59:36	0
2019-07-29	21:00:36	0
2019-07-29	21:01:36	0
2019-07-29	21:02:36	0
2019-07-29	21:03:36	0
2019-07-29	21:04:36	0
2019-07-29	21:05:36	0
2019-07-29	21:06:36	0
2019-07-29	21:07:36	0
2019-07-29	21:08:36	0
2019-07-29	21:09:36	0
2019-07-29	21:10:36	0
2019-07-29	21:11:36	0
2019-07-29	21:12:36	0
2019-07-29	21:13:36	0
2019-07-29	21:14:36	0
2019-07-29	21:15:36	0
2019-07-29	21:16:36	0
2019-07-29	21:17:36	0
2019-07-29	21:18:36	0
2019-07-29	21:19:36	0
2019-07-29	21:20:36	0
2019-07-29	21:21:36	0
2019-07-29	21:22:36	0
2019-07-29	21:23:36	0
2019-07-29	21:24:36	0
2019-07-29	21:25:36	0
2019-07-29	21:26:36	0
2019-07-29	21:27:36	0
2019-07-29	21:28:36	0
2019-07-29	21:29:36	0
2019-07-29	21:30:36	0
2019-07-29	21:31:36	0
2019-07-29	21:32:36	0
2019-07-29	21:33:36	0
2019-07-29	21:34:36	0
2019-07-29	21:35:36	0
2019-07-29	21:36:36	0
2019-07-29	21:37:36	0
2019-07-29	21:38:36	0
2019-07-29	21:39:36	0
2019-07-29	21:40:36	0
2019-07-29	21:41:36	0
2019-07-29	21:42:36	0
2019-07-29	21:43:36	0
2019-07-29	21:44:36	0
2019-07-29	21:45:36	0
2019-07-29	21:46:36	0
2019-07-29	21:47:36	0
