# Supplementary material for: A low-cost benthic incubation chamber for in-situ community metabolism measurements
Source: PeerJ. 2022 Apr 5;10:e13116. doi: 10.7717/peerj.13116 (PMC8992662; doi:10.7717/peerj.13116)
Supplement: Supplemental Information 8 — Data collected from seagrass incubations [file peerj-10-13116-s008.xlsx]

## Sheet: Seagrass
Date	Substate type	Chamber volume	Chamber number	Time of day	Start	End	Duration	Duration (hours)	Temperature ©	DO start (umol / l)	DO end (umol / L)	Salinity
2019-07-20	seagrass	10	1	peak	13:02:00	14:14:00	01:12:00	1.2	31.3	194	273.75	35.2
2019-07-20	seagrass	10	6	peak	13:05:00	14:13:00	01:08:00	1.13	31.1	194	264.69	35.16
2019-07-20	seagrass	10	4	peak	13:08:00	14:12:00	01:04:00	1.07	31.2	194	282.19	35.22
2019-07-20	seagrass	10	3	peak	13:15:00	14:16:00	01:01:00	1.02	31.2	194	275.31	35.12
2019-07-20	seagrass	10	5	peak	12:58:00	14:06:00	01:08:00	1.13	31.2	194	262.5	35.26
2019-07-20	sand	10	9	peak	12:50:00	14:04:00	01:14:00	1.23	31.4	194	257.81	35
2019-07-20	seagrass	10	2	peak	12:45:00	14:30:00	01:45:00	1.75	31.3	194	276.25	35.12
2019-07-20	seagrass	10	0	pm	15:23:00	17:22:00	01:59:00	1.98	29.7	206.56	243.75	35
2019-07-20	seagrass	10	4	pm	15:22:00	17:38:00	02:16:00	2.27	30.3	206.56	275	34.62
2019-07-20	seagrass	10	2	pm	15:40:00	17:57:00	02:17:00	2.28	30.3	206.56	271.56	35.46
2019-07-20	seagrass	10	1	pm	15:24:00	17:15:00	01:51:00	1.85	30.3	206.56	251.56	35
2019-07-20	seagrass	10	3	pm	15:26:00	17:05:00	01:39:00	1.65	30.1	206.56	235.94	35.17
2019-07-20	sand	10	5	pm	15:26:00	17:40:00	02:14:00	2.23	30.4	206.56	218.75	34.99
2019-07-20	seagrass	10	9	dark	18:52:00	20:02:00	01:10:00	1.17	30.1	231.98	201.25	34.9
2019-07-20	seagrass	10	2	dark	18:37:00	20:07:00	01:30:00	1.5	30.2	231.98	178.13	34.9
2019-07-20	seagrass	10	4	dark	18:28:00	20:13:00	01:45:00	1.75	30.1	231.98	169.69	34.9
2019-07-20	seagrass	10	1	dark	19:07:00	20:17:00	01:10:00	1.17	30.2	231.98	192.5	34.9
2019-07-20	sand	10	3	dark	19:05:00	20:25:00	01:20:00	1.33	30	231.98	217.19	34.9
2019-07-20	seagrass	10	5	dark	19:12:00	20:28:00	01:16:00	1.27	30.1	231.98	192.5	34.9
